# Supplementary material
Source: publisher figshare collection journal article supplement (https://gsapubs.figshare.com/ndownloader/files/28740378)
Supplement: Supplementary file 1 [file 28740378]

## Sheet: G49328
Foley, E.K., et al., 2021, Jurassic Arc: Reconstructing the Lost World of eastern Gondwana: Geology, v. 49, https://doi.org/10.1130/G49328.1

## Sheet: (S1) Run 27-03-2019
Sample/spot	176Hf/177Hf	176Hf/177Hf (normalised)	2σ	178Hf/177Hf	2s	176Lu/177Hf	2s		Age (Ma)	e Hf (t = now)	e Hf (t)	2σ
QMF7882_17	-	0.282877	4.02477e-05	1.46731	7.07046e-05	0.00119684	7.14351e-05		176	-	7.03436	1.4228
QMF7882_36	-	0.282839	5.05741e-05	1.46728	5.10728e-05	0.00180219	0.000110774		190	-	5.9144	1.78809
QMF1659_1	-	0.283	2.59764e-05	1.46722	3.59799e-05	0.00171435	0.000109903		162	-	11.0252	0.917894
QMF1659_17	-	0.282344	3.20783e-05	1.46724	3.48642e-05	0.000810529	4.13343e-05		162	-	-12.0954	1.13615
QMF1659_20	-	0.282805	3.67901e-05	1.46729	5.53188e-05	0.00234	6.34794e-05		168	-	4.19564	1.3009
QMF1659_33	-	0.28284	3.32374e-05	1.46721	4.61011e-05	0.00154679	0.000190973		161	-	5.34489	1.17513
QMF1659_33b	-	0.282816	3.26008e-05	1.46723	5.29667e-05	0.00131989	0.000142286		161	-	4.52201	1.15272
QMF1659_48	-	0.282808	3.65667e-05	1.46723	5.34069e-05	0.00159576	0.000214644		172	-	4.44033	1.29299
QMF1659_54	-	0.282898	3.78942e-05	1.46723	5.28607e-05	0.000781209	6.1181e-05		163	-	7.55074	1.3395
QMF1659_66	-	0.282572	3.25507e-05	1.46726	4.82053e-05	0.00096601	0.000129753		246	-	-2.2235	1.15194

## Sheet: (S1) Standards 27-03-2019 
Sample/spot	176Hf/177Hf	176Hf/177Hf (normalised)	2σ	178Hf/177Hf	2s	176Lu/177Hf	2s		Age (Ma)	e Hf (t = now)	e Hf (t)	2σ
MTZ_1	-	0.282489	1.3141e-05	1.46723	2.92459e-05	8.26423e-06	9.08104e-08		731	-10.4585	5.87428	0.465184
MTZ_2	-	0.282496	1.40697e-05	1.46722	2.69397e-05	8.24968e-06	8.95043e-08		731	-10.2311	6.10202	0.498052
MTZ_3	-	0.282493	1.4141e-05	1.46722	2.88482e-05	8.23395e-06	9.38815e-08		731	-10.3432	5.98975	0.500579
MTZ_4	-	0.282493	1.39495e-05	1.46724	2.8786e-05	8.28347e-06	8.69559e-08		731	-10.3111	6.02186	0.493798
MTZ_5	-	0.282487	1.67307e-05	1.46724	2.3317e-05	1.01522e-05	8.94206e-08		731	-10.5206	5.81111	0.592263
MTZ_6	-	0.282487	1.4192e-05	1.46723	3.17167e-05	8.24772e-06	8.64018e-08		731	-10.5387	5.79392	0.502396
MTZ_7	-	0.282488	1.26286e-05	1.46722	3.13794e-05	8.17596e-06	9.38457e-08		731	-10.5061	5.82659	0.447048
MTZ_8	-	0.282478	1.28308e-05	1.46722	2.61358e-05	8.21806e-06	9.52002e-08		731	-10.8639	5.46823	0.454224
MTZ_9	-	0.282494	1.55491e-05	1.46726	2.55833e-05	8.25443e-06	1.04987e-07		731	-10.2956	6.03746	0.550421
MTZ_10	-	0.282488	1.41391e-05	1.46723	2.71901e-05	8.54071e-06	1.21403e-07		731	-10.489	5.84355	0.500518
MTZ_11	-	0.28248	1.10607e-05	1.46725	2.70179e-05	8.16842e-06	9.56897e-08		731	-10.7707	5.56164	0.391558
MTZ_12	-	0.282491	1.33957e-05	1.46726	2.50835e-05	1.04255e-05	1.08025e-07		731	-10.4043	5.92755	0.474201
MTZ_13	-	0.28249	1.32298e-05	1.46723	2.72347e-05	8.39176e-06	1.115e-07		731	-10.4494	5.88334	0.46833
MTZ_14	-	0.282478	1.43309e-05	1.46722	2.45507e-05	8.46988e-06	1.08843e-07		731	-10.8626	5.46946	0.50733
MTZ_15	-	0.282482	1.11296e-05	1.46725	2.67125e-05	1.06756e-05	8.4785e-08		731	-10.6992	5.63201	0.393994
91500_1	-	0.282316	2.24072e-05	1.4672	4.57567e-05	0.000453472	4.79506e-07		1065	-16.5735	6.98285	0.793691
91500_2	-	0.282306	2.68845e-05	1.46725	3.61601e-05	0.000449808	1.86581e-06		1065	-16.9438	6.61424	0.952317
91500_3	-	0.282312	2.03949e-05	1.46721	3.99562e-05	0.000326696	5.14142e-07		1065	-16.7397	6.90646	0.722425
91500_4	-	0.2823	2.01541e-05	1.46722	4.0354e-05	0.000323317	9.9182e-07		1065	-17.1412	6.50645	0.713926
91500_5	-	0.282311	2.41459e-05	1.46725	3.62339e-05	0.000320549	1.69751e-06		1065	-16.7751	6.87538	0.855297
91500_6	-	0.282308	2.45457e-05	1.46725	3.8961e-05	0.000327967	6.43632e-07		1065	-16.8569	6.78813	0.869464
91500_7	-	0.282326	2.63067e-05	1.46721	4.40925e-05	0.000332459	8.52393e-07		1065	-16.216	7.42737	0.931784
FC1_1	-	0.282182	1.8482e-05	1.46721	2.75511e-05	0.00167232	1.33359e-06		1099	-21.3411	2.06936	0.654968
FC1_2	-	0.282167	1.56483e-05	1.4672	2.9562e-05	0.000629667	4.41201e-07		1099	-21.8629	2.31254	0.554577
FC1_3	-	0.282175	1.65302e-05	1.46722	2.45638e-05	0.00145171	5.0585e-06		1099	-21.5621	2.00993	0.585814
FC1_4	-	0.282185	1.83466e-05	1.46721	2.52703e-05	0.00145848	1.92179e-05		1099	-21.21	2.358	0.650163
FC1_5	-	0.282177	1.99058e-05	1.46723	1.8071e-05	0.001869	3.02462e-05		1099	-21.5008	1.76478	0.705436
FC1_6	-	0.282201	2.20463e-05	1.46723	2.63105e-05	0.0026813	1.38118e-05		1099	-20.6611	2.00961	0.781226
FC1_7	-	0.282182	2.20375e-05	1.46722	2.19909e-05	0.00170009	6.58151e-06		1099	-21.3312	2.05891	0.780967
FC1_8	-	0.282185	1.79999e-05	1.46724	3.02062e-05	0.00121481	3.98381e-06		1099	-21.2332	2.51383	0.637877
FC1_9	-	0.28217	1.90135e-05	1.46724	2.97923e-05	0.000982071	5.04248e-07		1099	-21.7354	2.18136	0.673831
FC1_10	-	0.282182	1.94453e-05	1.46722	2.4952e-05	0.00118421	4.45394e-06		1099	-21.3119	2.45736	0.689104

## Sheet: (S2) Run 22-01-2020
Sample/spot	176Hf/177Hf	176Hf/177Hf (normalised)	2σ	178Hf/177Hf	2s	180Hf/177Hf	2s	176Lu/177Hf	2s	173Yb/171Yb	2s		Age (Ma)	e Hf (t = now)	e Hf (t)	2σ
DINO_TRACK-1	0.282757	0.282769	3.1908e-05	1.46716	4.17905e-05	1.88679	3.09585e-05	0.00145166	4.806e-05	1.14155	0.000193253		245.4	-0.554167	4.66893	1.12841
DINO_TRACK-15	0.282807	0.28282	2.95668e-05	1.46716	4.26112e-05	1.88677	9.43074e-05	0.00106953	2.18544e-05	1.14186	0.000275722		246.7	1.22555	6.53979	1.04543
DINO_TRACK-18	0.282901	0.282914	2.92957e-05	1.46713	3.57883e-05	1.88675	9.51625e-05	0.00141721	3.18762e-05	1.14199	0.00021161		162.6	4.56007	8.02309	1.0355
DINO_TRACK-22	0.282726	0.282738	2.65242e-05	1.46715	4.00968e-05	1.88673	9.08493e-05	0.00114023	4.97289e-05	1.14148	0.000236428		169	-1.65553	1.9727	0.938118
DINO_TRACK-36	0.282895	0.282907	3.25279e-05	1.46717	3.81501e-05	1.88677	8.38029e-05	0.00154866	0.000280205	1.14177	0.000247138		192	4.31806	8.39183	1.14977
DINO_TRACK-39	0.282776	0.282789	2.88362e-05	1.46713	3.70487e-05	1.88685	9.8283e-05	0.00118597	3.78771e-05	1.14157	0.000276841		165.4	0.127917	3.67436	1.01971
DINO_TRACK-48	0.282704	0.282717	2.34879e-05	1.46712	3.37457e-05	1.88673	7.79195e-05	0.00142964	2.54532e-05	1.14159	0.000147402		190.7	-2.42612	1.63216	0.830794
DINO_TRACK-67	0.282876	0.282889	3.29462e-05	1.46713	3.97681e-05	1.88675	8.25834e-05	0.0017714	0.000133767	1.1418	0.000216581		189.6	3.66672	7.66124	1.16463
DINO_TRACK-75	0.282957	0.28297	2.28038e-05	1.46716	4.02726e-05	1.88683	7.27054e-05	0.000898037	6.52528e-05	1.14202	0.000267999		169.1	6.53083	10.1914	0.805875
DINO_TRACK-89	0.282932	0.282945	3.58105e-05	1.46717	3.72148e-05	1.88684	0.000102784	0.00175248	6.90323e-05	1.1414	0.000180205		165.9	5.65488	9.15193	1.26563
DINO_TRACK-96	0.282784	0.282797	2.6234e-05	1.4672	3.17686e-05	1.88688	7.89522e-05	0.00092765	4.40271e-05	1.14153	0.000259192		165.5	0.414905	3.99188	0.927664
DINO_TRACK-97	0.282465	0.282477	2.7572e-05	1.46715	4.97033e-05	1.88677	8.36429e-05	0.00115105	6.83143e-05	1.14147	0.000219426		227.6	-10.8867	-6.0034	0.97608
DINO_TRACK-106	0.282443	0.282456	2.94183e-05	1.46718	3.83742e-05	1.88685	7.44992e-05	0.000512825	1.92505e-05	1.14187	0.000419523		168.3	-11.6553	-7.97607	1.04152
DINO_TRACK-109	0.282789	0.282801	2.73559e-05	1.46717	3.6392e-05	1.88685	8.37324e-05	0.00113838	7.23997e-05	1.14168	0.000246907		165	0.578599	4.1218	0.967318
DINO_TRACK-110	0.28277	0.282783	2.86045e-05	1.46714	3.83761e-05	1.88681	7.50892e-05	0.00148572	4.54128e-05	1.14165	0.000216884		202.2	-0.068167	4.22897	1.01154
DINO_TRACK-112	0.282775	0.282787	3.08119e-05	1.46715	4.28515e-05	1.88678	7.78874e-05	0.00170283	9.88471e-05	1.14178	0.000150932		161.6	0.0769255	3.48647	1.08958
081018_6-52	0.282834	0.282847	3.41356e-05	1.46715	3.49996e-05	1.88686	9.16136e-05	0.00167356	7.2477e-05	1.1422	0.0002184		231.9	2.18597	7.08831	1.20686
081018_6-59	0.282993	0.283006	2.77624e-05	1.46715	4.0893e-05	1.88681	9.63335e-05	0.0013495	9.29905e-05	1.14207	0.000192406		190.2	7.81616	11.8782	0.980981
081018_6-66	0.282976	0.282989	2.44653e-05	1.4672	3.99251e-05	1.88685	9.12504e-05	0.00118484	1.28418e-05	1.14219	0.000226408		185.7	7.20285	11.1885	0.864533
081018_6-69	0.282979	0.282992	2.50079e-05	1.46718	4.02803e-05	1.88685	8.21915e-05	0.000646635	2.2391e-05	1.14212	0.000384996		174.4	7.31381	11.1186	0.883698
081018_6-71	0.282986	0.282999	2.73151e-05	1.46715	4.34908e-05	1.88729	0.00020951	0.00106512	9.86892e-06	1.1422	0.000189663		172.3	7.56407	11.2754	0.965202
081018_6-73	0.282851	0.282864	3.11489e-05	1.46715	4.39305e-05	1.88678	8.65642e-05	0.0012555	4.91745e-05	1.14203	0.000248967		195.3	2.78095	6.96211	1.1012
081018_6-74	0.282953	0.282966	2.59584e-05	1.46719	4.46984e-05	1.88682	7.34988e-05	0.000986259	2.0375e-06	1.14219	0.000269239		163.2	6.38291	9.90591	0.917371
081018_6-80	0.282985	0.282998	2.81887e-05	1.46713	4.12209e-05	1.88676	8.63515e-05	0.00128554	3.11663e-05	1.14215	0.00027561		191	7.52313	11.6102	0.996074
081018_6-82	0.282836	0.282849	3.3993e-05	1.46713	4.2479e-05	1.88682	0.000105183	0.00209415	9.33574e-05	1.14185	0.000197098		247.6	2.24299	7.40926	1.20181
081018_6-84	0.28267	0.282682	3.53923e-05	1.46716	4.67626e-05	1.8885	0.00019497	0.00149872	7.40667e-05	1.14197	0.000233421		178.6	-3.63522	0.156389	1.25202
081018_6-94	0.282972	0.282985	3.39759e-05	1.46714	4.06736e-05	1.8869	0.000121752	0.00206515	6.38795e-05	1.14166	0.000177502		213.1	7.0677	11.5187	1.20063
081018_6-95	0.283001	0.283014	2.8374e-05	1.46718	4.71452e-05	1.88677	9.26544e-05	0.00163718	9.5806e-05	1.14215	0.000171382		181.6	8.0873	11.9308	1.00257
081018_6-97	0.282923	0.282936	2.94715e-05	1.46717	3.19932e-05	1.88721	0.000125208	0.00139233	7.20036e-05	1.14171	0.000218528		182.3	5.33814	9.22493	1.04163
101018_2-1	0.282407	0.28242	2.53427e-05	1.46717	3.53565e-05	1.88674	9.6329e-05	0.00100126	3.53807e-05	1.14236	0.000242506		87	-12.911	-11.0392	0.897342
101018_2-2	0.282932	0.282945	2.85115e-05	1.46716	3.99486e-05	1.88676	0.000108596	0.000781277	1.56661e-05	1.14244	0.000332493		100.8	5.63957	7.82747	1.00767
101018_2-3	0.282938	0.28295	3.10393e-05	1.46712	3.84494e-05	1.88693	0.000144639	0.0021833	6.86801e-05	1.14214	0.000159561		229.3	5.84488	10.6166	1.09699
101018_2-4	0.282836	0.282849	2.4244e-05	1.46719	3.96876e-05	1.88697	8.33184e-05	0.00170325	5.78064e-05	1.14214	0.000131		221.1	2.25078	6.91992	0.857137
101018_2-5	0.282793	0.282806	3.32677e-05	1.46715	4.44405e-05	1.8868	9.50218e-05	0.00166838	2.3645e-05	1.14212	0.000202149		195.2	0.735549	4.86034	1.17634
101018_2-6	0.282954	0.282967	2.4251e-05	1.46716	3.96858e-05	1.88681	8.97211e-05	0.000532069	9.69032e-06	1.14236	0.000458357		102.2	6.41806	8.65339	0.857027
101018_2-8	0.28289	0.282902	3.19762e-05	1.46713	4.23213e-05	1.88673	9.15291e-05	0.00208236	0.000130616	1.14208	0.000190431		241.4	4.14154	9.18099	1.13029
101018_2-9	0.282937	0.282949	3.07429e-05	1.46714	4.10133e-05	1.88677	9.25958e-05	0.00124483	4.77907e-05	1.14182	0.000242928		99.1	5.80592	7.92655	1.08652
101018_2-10	0.282946	0.282959	2.51014e-05	1.46712	4.36844e-05	1.88679	0.000101358	0.000740192	1.58109e-05	1.14254	0.000369695		96.9	6.14305	8.24894	0.887106
101018_2-11	0.282843	0.282856	2.88303e-05	1.46721	3.93857e-05	1.88687	9.8163e-05	0.0015255	6.37208e-05	1.14226	0.000220217		207.2	2.50938	6.90876	1.01926
101018_2-12	0.282957	0.28297	2.48782e-05	1.46713	3.98961e-05	1.88678	7.93442e-05	0.00105507	1.92152e-05	1.14198	0.000197599		101.9	6.52617	8.71973	0.879184
101018_2-13	0.282911	0.282924	2.84065e-05	1.46716	3.25732e-05	1.88681	0.000100182	0.00111493	0.000146584	1.14227	0.000269955		188.5	4.89767	8.95135	1.00404
101018_2-14	0.282967	0.28298	2.54551e-05	1.46719	3.46073e-05	1.8868	8.59056e-05	0.000763347	4.34247e-05	1.14213	0.000337562		103.1	6.89761	9.137	0.899536
101018_2-15	0.282962	0.282974	3.4766e-05	1.46715	4.60113e-05	1.88687	9.97964e-05	0.00243602	6.5208e-05	1.14259	0.000144351		104	6.69173	8.83566	1.22859
101018_2-18	0.282568	0.282581	4.26475e-05	1.46715	3.38203e-05	1.88675	8.69262e-05	0.000855461	7.28562e-05	1.14186	0.000247828		135.6	-7.22066	-4.28676	1.50921
101018_2-20	0.282964	0.282976	2.49139e-05	1.46716	4.01371e-05	1.88684	7.51662e-05	0.000993561	1.41444e-05	1.14221	0.000233678		99	6.76639	8.90153	0.880425
101018_2-21	0.28301	0.283022	2.9846e-05	1.46712	4.766e-05	1.88678	0.00010271	0.00133645	7.40899e-05	1.1421	0.000267634		107.7	8.39026	10.6892	1.05455
101018_2-22	0.28291	0.282923	2.58142e-05	1.46714	4.24349e-05	1.88674	8.88253e-05	0.000685037	5.0903e-05	1.14197	0.000429138		241.5	4.87919	10.1445	0.912412
101018_2-23	0.282921	0.282934	2.83017e-05	1.46718	3.80026e-05	1.88687	8.55706e-05	0.000486599	9.54933e-06	1.14238	0.000526296		240.7	5.2641	10.5438	1.00029
101018_2-26	0.282953	0.282966	2.74979e-05	1.46716	3.49476e-05	1.88677	8.60956e-05	0.00101348	0.000102443	1.14223	0.000236189		106.1	6.38624	8.67321	0.971777
101018_2-27	0.28296	0.282973	3.35039e-05	1.46715	4.96194e-05	1.88781	0.00034392	0.000626297	2.05692e-05	1.14208	0.000502594		111.9	6.64498	9.08584	1.184
101018_2-28	0.282996	0.283009	2.90064e-05	1.46711	3.6083e-05	1.88678	8.97698e-05	0.000664282	4.16169e-05	1.14277	0.000399616		97.8	7.90068	10.0314	1.02493
101018_2-29	0.282945	0.282958	2.63752e-05	1.46715	3.77292e-05	1.88682	8.93917e-05	0.00114472	0.000125206	1.14221	0.000242033		240.8	6.11126	11.2887	0.932125
101018_2-30	0.282946	0.282958	2.75863e-05	1.46718	3.9416e-05	1.88678	9.41738e-05	0.00129798	4.05743e-05	1.14208	0.00023111		199.7	6.13048	10.4019	0.974923
101018_2-35	0.282907	0.282919	2.5778e-05	1.46716	3.53626e-05	1.88673	8.97594e-05	0.0020037	0.000268275	1.14228	0.000184541		196.3	4.74451	8.85079	0.911145
101018_2-36	0.282953	0.282966	2.29494e-05	1.46714	3.61541e-05	1.88679	8.32671e-05	0.000466884	8.57371e-06	1.14224	0.000434092		98.7	6.39021	8.55315	0.81103
101018_2-38	0.282446	0.282458	2.84884e-05	1.46715	3.80103e-05	1.88685	7.04131e-05	0.0010833	2.65294e-05	1.14236	0.000218941		216.1	-11.5528	-6.90748	1.00859
101018_2-39	0.282944	0.282956	2.98824e-05	1.46717	4.5218e-05	1.88686	7.8257e-05	0.00168699	2.84333e-05	1.14242	0.000218512		113.6	6.05091	8.44909	1.05608
101018_2-42	0.282775	0.282788	2.95608e-05	1.46715	4.53815e-05	1.88694	9.7253e-05	0.00114321	9.90563e-05	1.14195	0.000303291		129.4	0.0924274	2.86946	1.04533
101018_2-43	0.282952	0.282965	3.35295e-05	1.46711	3.78225e-05	1.88765	0.000211419	0.00105945	6.49343e-05	1.14172	0.00033531		100.5	6.35175	8.51481	1.18494
101018_2-45	0.282962	0.282974	2.83926e-05	1.46712	3.72974e-05	1.88671	7.35051e-05	0.00154582	2.56891e-05	1.14206	0.000177489		105.3	6.69399	8.92671	1.00336
101018_2-47	0.282941	0.282954	2.87949e-05	1.46717	3.8234e-05	1.88675	9.43059e-05	0.000672133	1.45774e-05	1.14233	0.000435067		105.2	5.96404	8.25522	1.01765
101018_2-48	0.283013	0.283026	2.8133e-05	1.46715	3.78026e-05	1.88678	7.52664e-05	0.00108961	2.22279e-05	1.14236	0.000258263		99.8	8.50814	10.6546	0.994011
101018_2-49	0.282915	0.282928	2.9351e-05	1.46713	4.68551e-05	1.88685	0.000111973	0.00295821	5.84216e-05	1.1424	0.000157206		198.2	5.04846	9.06953	1.0374
101018_2-50	0.282949	0.282962	3.13112e-05	1.46715	3.5376e-05	1.88676	7.13462e-05	0.000738276	8.31918e-06	1.14199	0.000420248		110	6.25326	8.64438	1.10655
101018_2-52	0.282852	0.282865	2.56637e-05	1.46711	3.24211e-05	1.88675	9.50939e-05	0.00113285	3.80549e-05	1.14226	0.000215096		107.8	2.80799	5.12228	0.907278
101018_2-56	0.282904	0.282917	3.70467e-05	1.46713	4.19053e-05	1.88673	8.17365e-05	0.00217721	2.00034e-05	1.14225	0.000187637		129.2	4.64987	7.33559	1.30946
101018_2-58	0.282915	0.282928	2.74143e-05	1.46714	3.33134e-05	1.88694	7.62079e-05	0.00214828	6.60751e-05	1.14209	0.000137718		194.8	5.04083	9.09715	0.96895
101018_2-59	0.282896	0.282908	2.95984e-05	1.46714	4.05143e-05	1.88681	9.1227e-05	0.00152157	5.8077e-05	1.14241	0.000174862		196.9	4.35806	8.53958	1.04622
101018_2-60	0.282913	0.282926	3.03428e-05	1.46716	4.54624e-05	1.88685	9.17989e-05	0.00080562	1.97383e-05	1.14212	0.000304638		99.4	4.96575	7.12147	1.07247
101018_2-61	0.282936	0.282949	2.53274e-05	1.46715	3.69522e-05	1.88679	7.72416e-05	0.00073149	3.1703e-05	1.142	0.000314533		101.2	5.78358	7.98353	0.895124
101018_2-62	0.282695	0.282707	2.94174e-05	1.46717	3.32792e-05	1.88674	7.7506e-05	0.00120011	3.0595e-05	1.14206	0.00019023		247.9	-2.74667	2.56987	1.04056
101018_2-63	0.282992	0.283005	3.19858e-05	1.46716	3.63605e-05	1.88683	8.46173e-05	0.00208504	0.000113957	1.14237	0.000131867		122.3	7.78114	10.3315	1.13022
101018_2-64	0.283009	0.283022	2.85138e-05	1.46719	3.76166e-05	1.8868	8.84331e-05	0.00144488	2.28865e-05	1.1419	0.00022092		111	8.37881	10.7404	1.00748
101018_2-65	0.282965	0.282978	2.77988e-05	1.46715	3.63634e-05	1.88672	9.225e-05	0.00149895	0.000110536	1.14209	0.000199515		99.9	6.81199	8.9332	0.982366
101018_2-66	0.282944	0.282956	3.03154e-05	1.46714	3.44191e-05	1.88674	7.94443e-05	0.000875797	1.36133e-05	1.14195	0.000295127		99.9	6.05158	8.21377	1.07138
101018_2-67	0.282768	0.282781	2.53871e-05	1.46715	3.28416e-05	1.88679	6.62097e-05	0.000794135	2.43284e-06	1.1419	0.000250055		109.5	-0.148342	2.22629	0.897767
101018_2-68	0.282941	0.282954	3.0464e-05	1.46717	2.89486e-05	1.88671	8.46581e-05	0.00174827	0.000291891	1.14189	0.000150258		119	5.96152	8.46901	1.07664
101018_2-69	0.282921	0.282933	2.75352e-05	1.4671	4.03833e-05	1.88674	8.90472e-05	0.00031177	1.13099e-05	1.14249	0.000862927		95.8	5.24508	7.35397	0.973205
101018_2-71	0.282948	0.28296	2.45267e-05	1.46714	3.53048e-05	1.88676	7.49042e-05	0.000827921	1.59326e-05	1.14225	0.000315995		103.3	6.19488	8.43405	0.866789
101018_2-74	0.28296	0.282972	2.53823e-05	1.46716	3.82152e-05	1.88677	7.37733e-05	0.000881848	1.56249e-05	1.14204	0.000203883		109.5	6.61727	8.9872	0.89699
101018_2-75	0.282975	0.282987	3.04606e-05	1.46715	4.64532e-05	1.88672	8.52239e-05	0.000874899	2.26392e-05	1.14242	0.000459307		102.3	7.15307	9.36758	1.0764
101018_2-76	0.282936	0.282949	2.89438e-05	1.46715	4.28888e-05	1.88676	9.58043e-05	0.00132597	7.8127e-05	1.14208	0.000232135		132.6	5.79564	8.62711	1.02293
101018_2-77	0.282929	0.282942	2.85106e-05	1.46718	3.69175e-05	1.8867	8.95393e-05	0.00111679	2.69182e-05	1.14185	0.000268961		242.3	5.54456	10.7585	1.00765
101018_2-78	0.282795	0.282808	2.81909e-05	1.46714	3.29504e-05	1.88673	8.21373e-05	0.001189	1.42179e-05	1.14213	0.000228963		107.2	0.808257	3.1052	0.996821
101018_2-79	0.282846	0.282859	2.75597e-05	1.46716	4.29251e-05	1.88681	8.32247e-05	0.00169507	9.96098e-05	1.14184	0.000172715		193.7	2.61121	6.70163	0.974329
101018_2-80	0.282838	0.282851	2.99288e-05	1.46716	4.33331e-05	1.88699	8.65365e-05	0.0015689	6.7515e-05	1.14212	0.000177584		200.6	2.33561	6.5887	1.05811
101018_2-82	0.282821	0.282834	2.79917e-05	1.46716	3.63567e-05	1.88671	7.34617e-05	0.000955243	3.18956e-05	1.14196	0.000301326		128.2	1.735	4.50264	0.989685
101018_2-84	0.282939	0.282952	3.13622e-05	1.46713	3.52321e-05	1.88673	8.47442e-05	0.00169137	1.43687e-05	1.14204	0.00022906		129.8	5.89044	8.6307	1.1084
101018_2-85	0.282963	0.282975	3.10486e-05	1.46715	4.10492e-05	1.88703	0.000209305	0.00157248	0.00014413	1.14187	0.0002581		105.7	6.72496	8.96431	1.09722
101018_2-87	0.282939	0.282952	2.61661e-05	1.46715	3.60789e-05	1.88679	7.60357e-05	0.000830038	2.7795e-05	1.14207	0.000284356		98.5	5.89291	8.02771	0.924753
101018_2-89	0.282929	0.282942	2.28765e-05	1.46716	3.88797e-05	1.88669	7.59359e-05	0.000696424	1.49158e-05	1.14249	0.000299084		102.8	5.52992	7.76702	0.808525
101018_2-90	0.28294	0.282953	2.77453e-05	1.46711	4.10766e-05	1.88677	8.97544e-05	0.000864803	1.53388e-05	1.14208	0.000297075		103.3	5.91925	8.15583	0.980565
101018_2-92	0.28286	0.282873	2.97637e-05	1.46717	3.72046e-05	1.88674	8.99915e-05	0.0016367	7.42092e-05	1.14193	0.000200948		202.8	3.10821	7.3993	1.05219
101018_2-95	0.28243	0.282443	2.41047e-05	1.46713	2.95741e-05	1.8868	6.58446e-05	0.000501029	2.23455e-05	1.1415	0.000392978		178.2	-12.0968	-8.19946	0.853435
101018_2-96	0.28293	0.282942	2.85451e-05	1.46715	3.74674e-05	1.88676	9.43741e-05	0.00137231	6.77888e-05	1.14175	0.000234903		159.4	5.56014	8.95997	1.00887
101018_2-98	0.282874	0.282887	2.91652e-05	1.46715	3.56808e-05	1.88681	7.14243e-05	0.00241441	0.000248817	1.14195	0.000141382		124.8	3.60702	6.18128	1.03098
101018_2-99	0.283017	0.283029	2.77584e-05	1.46719	3.87522e-05	1.88682	7.03526e-05	0.000685514	4.49366e-06	1.14193	0.000369434		105.6	8.63537	10.935	0.980762
101018_4_1	0.282762	0.282775	2.59234e-05	1.46715	3.38301e-05	1.88701	8.62231e-05	0.00100092	2.20411e-05	1.14202	0.000199943		248.4	-0.370444	4.99092	0.916751
101018_4_3	0.282896	0.282909	2.80194e-05	1.46716	3.7618e-05	1.88679	9.91558e-05	0.00111765	6.11664e-06	1.14184	0.00024768		182.8	4.37104	8.30134	0.990406
101018_4_6	0.282995	0.283008	2.60898e-05	1.46714	3.56536e-05	1.88677	7.55936e-05	0.000703059	1.76169e-05	1.14236	0.000453782		150.3	7.8765	11.1492	0.921875
101018_4_8	0.283023	0.283036	2.97712e-05	1.46717	3.98577e-05	1.88683	8.17805e-05	0.0013753	6.35576e-05	1.14302	0.000237462		209.7	8.87013	13.3465	1.05185
101018_4_12	0.282993	0.283006	2.52785e-05	1.46714	3.66231e-05	1.88678	7.64689e-05	0.000553019	1.62064e-05	1.14326	0.000468514		150.5	7.81414	11.1061	0.893214
101018_4_14	0.282998	0.283011	2.69002e-05	1.46714	3.1396e-05	1.88676	8.43905e-05	0.000716976	2.93449e-05	1.14291	0.000381576		150.2	7.97577	11.2449	0.9505
101018_4_18	0.282658	0.282671	3.22529e-05	1.46711	3.78778e-05	1.88686	8.85974e-05	0.0011186	3.02399e-05	1.14277	0.000277032		177	-4.03819	-0.236269	1.14101
101018_4_19	0.282816	0.282829	3.08714e-05	1.46713	4.86647e-05	1.88852	0.000245271	0.000722603	9.72052e-06	1.14258	0.00040208		186.2	1.55275	5.60382	1.09152
101018_4_20	0.282969	0.282982	2.68874e-05	1.46712	3.8769e-05	1.88684	8.49583e-05	0.000791102	1.18593e-05	1.14275	0.000299644		183.1	6.96022	10.9376	0.950144
101018_4_21	0.282847	0.28286	3.02875e-05	1.46715	3.47745e-05	1.88748	0.000554684	0.00219532	6.06909e-05	1.14282	0.00014274		218.5	2.64346	7.18657	1.07076
101018_4_22	0.283013	0.283026	2.69635e-05	1.46715	3.80974e-05	1.88682	9.37684e-05	0.00132704	1.79746e-06	1.14279	0.000190234		182.1	8.50279	12.3945	0.952689
101018_4_23	0.282977	0.28299	2.59382e-05	1.46714	4.12335e-05	1.8868	7.65158e-05	0.00139731	8.88568e-05	1.14281	0.000210253		193.8	7.24436	11.3771	0.916575
101018_4_27	0.283017	0.283029	3.04984e-05	1.46715	3.61763e-05	1.88675	8.34894e-05	0.00197015	1.56127e-05	1.1427	0.000188418		186.1	8.63606	12.5343	1.07757
101018_4_28	0.28299	0.283003	2.52638e-05	1.46714	3.52968e-05	1.8871	8.76277e-05	0.00141472	1.44944e-05	1.14288	0.000178836		180	7.70369	11.5396	0.892706
101018_4_30	0.282985	0.282997	2.96003e-05	1.46713	4.01556e-05	1.88678	8.49404e-05	0.000738708	1.93132e-05	1.14316	0.000397117		183.8	7.50306	11.5023	1.04596
101018_4_34	0.282981	0.282994	2.65298e-05	1.46715	3.96122e-05	1.88683	0.000100282	0.000597871	3.34526e-05	1.14218	0.000441135		156.7	7.38342	10.8065	0.937468
101018_4_35	0.283009	0.283022	2.62923e-05	1.46716	3.79714e-05	1.88681	8.52129e-05	0.00103744	2.96199e-05	1.14215	0.000260133		152.4	8.36874	11.6537	0.928987
101018_4_36	0.282524	0.282536	2.45301e-05	1.46719	3.5933e-05	1.88678	6.56735e-05	0.000573015	5.05561e-06	1.14163	0.000284788		174.7	-8.8002	-4.98657	0.86821
101018_4_37	0.282979	0.282992	2.52549e-05	1.46713	3.29681e-05	1.8869	7.6784e-05	0.000528423	1.07087e-05	1.14131	0.000413609		184	7.31434	11.3434	0.892425
101018_4_40	0.282631	0.282644	2.81359e-05	1.46715	4.07751e-05	1.88677	8.4857e-05	0.0012984	3.17367e-05	1.14156	0.000213244		181.5	-4.98607	-1.10926	0.995453
101018_4_42	0.282982	0.282995	2.37516e-05	1.46712	3.14721e-05	1.88677	7.80319e-05	0.000565084	2.54097e-05	1.14144	0.000416497		154.8	7.42365	10.8085	0.839293
101018_4_46	0.282996	0.283008	2.73918e-05	1.46717	3.84801e-05	1.88679	7.23437e-05	0.000585778	2.61289e-05	1.1419	0.000449514		153.5	7.89279	11.2472	0.967879
101018_4_49	0.282564	0.282577	2.65758e-05	1.46716	4.41465e-05	1.88681	9.01076e-05	0.000863927	5.59738e-05	1.1421	0.000344281		234.5	-7.37072	-2.29256	0.940482
101018_4_50	0.283001	0.283013	2.43511e-05	1.46717	4.4952e-05	1.88679	8.06397e-05	0.00081551	1.31484e-05	1.14174	0.000303021		152.3	8.07306	11.3781	0.860424
101018_4_51	0.282976	0.282989	2.47673e-05	1.46712	3.68986e-05	1.88678	7.96665e-05	0.000815411	3.64778e-06	1.1419	0.000256583		162	7.19324	10.7089	0.875205
101018_4_52	0.282408	0.282421	2.36454e-05	1.46717	3.60738e-05	1.88681	8.76485e-05	0.000646683	4.17261e-05	1.14154	0.000312485		185.6	-12.8768	-8.83548	0.837239
101018_4_53	0.282919	0.282932	2.72269e-05	1.46715	3.44706e-05	1.88676	7.72239e-05	0.0011555	4.79455e-05	1.14177	0.0002748		192.7	5.18859	9.32775	0.962312
101018_4_54	0.28288	0.282893	2.7096e-05	1.46717	3.7113e-05	1.88687	8.78846e-05	0.000804796	0.000108077	1.1421	0.000370837		189.7	3.82103	7.93905	0.957816
101018_4_57	0.282893	0.282906	2.58033e-05	1.46715	3.51927e-05	1.88679	6.49476e-05	0.00102626	1.77216e-05	1.14214	0.000238029		247.3	4.26493	9.60088	0.91208
101018_4_59	0.282987	0.283	2.4755e-05	1.46712	3.68821e-05	1.88681	8.49795e-05	0.000586516	1.03511e-05	1.14258	0.000486645		155.1	7.59654	10.9858	0.874735
101018_4_61	0.282847	0.28286	2.95504e-05	1.46716	3.33214e-05	1.88677	6.62562e-05	0.00105794	2.52572e-05	1.14268	0.000273255		177.2	2.63727	6.45324	1.0447
101018_4_63	0.283007	0.28302	2.30801e-05	1.46716	3.59698e-05	1.88681	7.0406e-05	0.000843231	4.1228e-05	1.14237	0.000274148		146.7	8.3073	11.488	0.815495
101018_4_64	0.282915	0.282928	2.69505e-05	1.46716	4.16399e-05	1.8868	8.62254e-05	0.00107195	1.23846e-05	1.14263	0.000255582		191.5	5.03561	9.15945	0.952557
101018_4_65	0.282721	0.282733	2.71152e-05	1.46714	3.89824e-05	1.88682	7.20355e-05	0.0017752	3.18051e-05	1.14266	0.000136993		224	-1.83412	2.88371	0.959039
101018_4_66	0.282843	0.282856	2.72147e-05	1.46715	4.41997e-05	1.88672	8.46826e-05	0.00108273	6.43004e-05	1.14246	0.000280798		241.7	2.49075	7.69555	0.962142
101018_4_67	0.282979	0.282992	2.91222e-05	1.46712	3.65236e-05	1.8868	9.06259e-05	0.000986168	1.70712e-05	1.14312	0.000258846		184.5	7.31328	11.2975	1.02908
101018_4_68	0.283013	0.283026	2.36643e-05	1.46717	3.2765e-05	1.88692	6.82742e-05	0.000883976	2.58266e-05	1.14263	0.000230334		158.9	8.52327	11.9648	0.836118
101018_4_69	0.282995	0.283008	2.15107e-05	1.46718	3.45546e-05	1.88683	8.31438e-05	0.00053733	2.94357e-05	1.14226	0.00038074		171.1	7.87734	11.6226	0.760075
101018_4_72	0.283002	0.283015	2.60802e-05	1.46718	3.54829e-05	1.88676	8.78343e-05	0.000614713	2.20359e-05	1.14275	0.000451023		190.2	8.12947	12.2841	0.921512
101018_4_73	0.282971	0.282984	2.88378e-05	1.46715	4.96912e-05	1.88677	8.94919e-05	0.00115926	0.000117252	1.14231	0.000364821		193.9	7.04031	11.2056	1.01906
101018_4_75	0.283005	0.283018	2.64787e-05	1.46715	3.74462e-05	1.88675	7.51795e-05	0.000733425	2.99913e-05	1.1428	0.000326599		155.7	8.22953	11.617	0.935583
101018_4_81	0.282956	0.282969	2.88322e-05	1.46716	2.79328e-05	1.88682	8.26469e-05	0.00112815	1.84506e-05	1.14244	0.000276224		177.4	6.4961	10.3097	1.01892
101018_4_83	0.282981	0.282994	2.50063e-05	1.46714	3.93451e-05	1.88685	8.92492e-05	0.00129814	6.56931e-05	1.14223	0.000208778		175	7.39159	11.1341	0.883632
RP1-DZ-UGR-101	0.282969	0.282982	2.46866e-05	1.46718	4.46791e-05	1.88689	9.57429e-05	0.000868827	2.59195e-05	1.14134	0.000307216		155.3	6.95658	10.321	0.872375
RP1-DZ-UGR-102	0.282931	0.282944	3.34208e-05	1.46717	4.00387e-05	1.88692	9.06245e-05	0.00235934	6.52401e-05	1.14152	0.000241703		121.3	5.60204	8.10895	1.18118
RP1-DZ-UGR-103	0.283003	0.283016	2.79153e-05	1.46719	3.74754e-05	1.88685	8.68847e-05	0.00124162	1.61446e-05	1.14177	0.000201005		223.2	8.16513	12.9499	0.986352
RP1-DZ-UGR-104	0.282811	0.282824	2.77972e-05	1.46718	3.58694e-05	1.887	9.42032e-05	0.00136835	2.04316e-05	1.14189	0.000207458		251	1.37246	6.73002	0.982845
RP1-DZ-UGR-107	0.283026	0.283038	2.43619e-05	1.46716	4.25448e-05	1.88679	8.45132e-05	0.000752162	3.26512e-05	1.14157	0.000406573		153.2	8.95707	12.2884	0.860727
RP1-DZ-UGR-108	0.282867	0.28288	3.05672e-05	1.46717	3.6846e-05	1.88682	7.61173e-05	0.00146734	2.76415e-05	1.14164	0.000214755		188.5	3.33752	7.3466	1.08057
RP1-DZ-UGR-112	0.282962	0.282975	3.03555e-05	1.46717	3.87136e-05	1.8868	9.5555e-05	0.00149949	0.00010195	1.14169	0.000230732		129.1	6.69978	9.44185	1.07273
RP1-DZ-UGR-113	0.282882	0.282895	3.21047e-05	1.4672	3.68901e-05	1.8868	8.81925e-05	0.00218033	0.000170288	1.14143	0.000190788		120.2	3.88887	6.38679	1.13486
RP1-DZ-UGR-117	0.28297	0.282983	3.85451e-05	1.4672	0.000125681	1.88704	0.000476081	0.000872072	6.4499e-05	1.14095	0.00195982		156.1	6.98437	10.3658	1.3621
RP1-DZ-UGR-120	0.282955	0.282967	3.67379e-05	1.46715	3.45818e-05	1.88701	8.32604e-05	0.00222432	0.000153934	1.14148	0.000183493		222.4	6.44413	11.0661	1.29831
RP1-DZ-UGR-53	0.282807	0.28282	2.58236e-05	1.46718	3.6961e-05	1.88684	8.01175e-05	0.00157239	9.20012e-05	1.14164	0.000199793		243.1	1.23673	6.39227	0.913075
RP1-DZ-UGR-56	0.282869	0.282882	2.77132e-05	1.46718	3.54003e-05	1.88691	7.94369e-05	0.00149517	5.91033e-05	1.14154	0.000216763		124.7	3.41321	6.06113	0.979675
RP1-DZ-UGR-76	0.282872	0.282885	3.30378e-05	1.46716	4.06512e-05	1.88678	9.40402e-05	0.00209966	8.68001e-05	1.14173	0.00017392		225.3	3.51841	8.21798	1.16789
RP1-DZ-UGR-81	0.282744	0.282757	2.80361e-05	1.46716	3.69944e-05	1.88691	0.000107654	0.000998034	5.58866e-05	1.1416	0.00028772		250.8	-0.996026	4.41742	0.991527
RP1-DZ-UGR-82	0.283038	0.28305	2.68012e-05	1.46714	3.45071e-05	1.88683	9.69156e-05	0.00183428	3.55933e-05	1.14177	0.00018208		168.4	9.37647	12.9186	0.946871
RP1-DZ-UGR-84	0.2829	0.282913	3.69096e-05	1.46714	4.70663e-05	1.88699	0.000137266	0.00170525	7.66759e-05	1.14147	0.000248527		120.2	4.52957	7.06541	1.30463
RP1-DZ-UGR-86	0.282973	0.282986	3.18435e-05	1.46717	4.17182e-05	1.88684	8.91357e-05	0.00260583	0.000233439	1.14161	0.000155647		132.1	7.11173	9.8211	1.12527
RP1-DZ-UGR-91	0.28289	0.282902	2.89838e-05	1.46716	4.12707e-05	1.88677	8.36874e-05	0.0015342	8.54452e-05	1.14156	0.000191287		155.9	4.14498	7.45284	1.02452
RP1-DZ-UGR-92	0.282968	0.28298	2.96291e-05	1.46712	4.81695e-05	1.88675	9.73309e-05	0.00141786	5.14113e-05	1.1416	0.000236596		126.8	6.90121	9.60126	1.04704
RP1-DZ-UGR-94	0.282908	0.28292	3.42933e-05	1.46716	3.93249e-05	1.88679	9.80088e-05	0.00148477	9.31367e-05	1.14149	0.000248759		227.1	4.77831	9.6086	1.21212
RP1-DZ-UGR-95	0.282913	0.282926	2.74863e-05	1.46714	3.18338e-05	1.88682	8.61165e-05	0.000587243	1.44366e-05	1.14183	0.000413909		136.4	4.97822	7.95735	0.971501
RP1-DZ-UGR-98	0.282806	0.282819	3.29543e-05	1.46715	3.27008e-05	1.8868	9.73823e-05	0.00135645	2.61835e-05	1.14188	0.000252478		193.7	1.19726	5.33046	1.16521
RP1-DZ-UGR-99	0.283025	0.283038	2.95722e-05	1.46717	3.74954e-05	1.88682	0.000114739	0.00139759	4.41832e-05	1.14187	0.000246725		190.1	8.9319	12.9862	1.04481
W1-DZ-UGR-116	0.282971	0.282983	2.3922e-05	1.46717	3.68137e-05	1.88758	0.000165663	0.000912981	6.86295e-05	1.14181	0.00033336		149.7	7.00695	10.2455	0.845349
W1-DZ-UGR-120	0.283023	0.283036	4.23462e-05	1.46719	4.04089e-05	1.8873	0.000113075	0.00235311	0.000138837	1.14189	0.000200014		222	8.87853	13.4745	1.49614
W1-DZ-UGR-121	0.282719	0.282731	3.76914e-05	1.46711	4.64882e-05	1.88678	0.000114878	0.00151557	2.73688e-05	1.14169	0.000243467		240.3	-1.90341	3.19995	1.33312
W1-DZ-UGR-122	0.282945	0.282958	2.70217e-05	1.46716	4.0263e-05	1.88681	8.38672e-05	0.0010113	1.14009e-05	1.14151	0.000243105		183.2	6.10618	10.0587	0.954972
W1-DZ-UGR-123	0.28294	0.282953	2.84177e-05	1.46716	4.08078e-05	1.88682	8.36766e-05	0.000991915	2.14446e-05	1.14161	0.000296802		135.2	5.93986	8.85685	1.00433
W1-DZ-UGR-124	0.282928	0.282941	2.76978e-05	1.46716	4.37236e-05	1.88684	8.19414e-05	0.00102458	2.06674e-05	1.14147	0.000234614		142.9	5.50691	8.58708	0.978927
W1-DZ-UGR-126	0.282936	0.282949	2.44979e-05	1.46715	3.69281e-05	1.88676	6.86927e-05	0.000822602	2.14491e-05	1.1415	0.000308515		135.2	5.78531	8.71739	0.865808
W1-DZ-UGR-128	0.282897	0.28291	2.58475e-05	1.46716	3.96381e-05	1.88679	7.11373e-05	0.00158387	4.96752e-05	1.14156	0.000181406		177.6	4.40056	8.16406	0.91363
W1-DZ-UGR-140	0.282949	0.282962	2.95417e-05	1.46715	4.59727e-05	1.88684	7.56194e-05	0.000415038	1.1274e-05	1.14166	0.000604272		168	6.23947	9.92972	1.04402
W1-DZ-UGR-142	0.282961	0.282974	2.3837e-05	1.46716	2.74437e-05	1.88679	7.90237e-05	0.000706149	3.68679e-05	1.14149	0.000315125		137.1	6.6749	9.65907	0.842374
W1-DZ-UGR-143	0.282898	0.28291	2.56569e-05	1.46713	3.44394e-05	1.88682	6.94795e-05	0.00101808	1.3605e-05	1.14158	0.000255687		247.7	4.42914	9.77519	0.906893
W1-DZ-UGR-147	0.282858	0.282871	3.05112e-05	1.46716	3.96982e-05	1.8868	8.48523e-05	0.00141399	6.9777e-05	1.14139	0.000191726		236.8	3.03461	8.08197	1.07863
W1-DZ-UGR-149	0.283018	0.283031	2.95166e-05	1.46718	4.24664e-05	1.88689	0.000101447	0.00172271	0.000116811	1.14134	0.000197616		190.4	8.69491	12.7146	1.04288
W1-DZ-UGR-150	0.283	0.283013	2.79225e-05	1.46719	3.93623e-05	1.88682	7.81867e-05	0.000967722	7.19664e-05	1.14157	0.000323381		154.7	8.06501	11.4067	0.986613
W1-DZ-UGR-151	0.282951	0.282964	2.64349e-05	1.46712	3.37637e-05	1.88683	9.60924e-05	0.000705393	5.08626e-05	1.14181	0.000449254		137.2	6.3217	9.30802	0.934214
W1-DZ-UGR-96	0.282915	0.282928	3.05475e-05	1.46713	4.0556e-05	1.88675	6.85289e-05	0.00142272	6.81006e-05	1.14161	0.000216982		170.2	5.04916	8.67393	1.07969

## Sheet: (S2) Standards 22-01-2020
Sample/spot	176Hf/177Hf	176Hf/177Hf (normalised)	2σ	178Hf/177Hf	2s	176Lu/177Hf	2s		Age (Ma)	e Hf (t = now)	e Hf (t)	2σ
MTZ-01	0.282497	-	1.06329e-05	1.46717	2.54e-05	9.4598e-06	8.38332e-08		731	-10.1792	6.15346	0.752779
MTZ-02	0.282502	-	1.09937e-05	1.46719	2.68e-05	1.06636e-05	1.01025e-07		731	-9.99205	6.34031	0.77831
MTZ-03	0.282495	-	1.04962e-05	1.46717	2.83e-05	9.88057e-06	8.56697e-08		731	-10.2721	6.06017	0.743111
MTZ-04	0.282487	-	1.12107e-05	1.46719	3.16e-05	1.00887e-05	7.60429e-08		731	-10.5231	5.80869	0.793711
MTZ-05	0.282497	-	1.07302e-05	1.46716	3.01e-05	1.79162e-05	9.27551e-08		731	-10.1847	6.14383	0.75967
MTZ-06	0.282494	-	1.20505e-05	1.46713	2.82e-05	1.71486e-05	1.04409e-07		731	-10.2961	6.03257	0.853149
MTZ-07	0.282492	-	1.07525e-05	1.46717	2.76e-05	1.15063e-05	1.0528e-07		731	-10.3589	5.97243	0.761258
MTZ-08	0.282491	-	1.10924e-05	1.46718	2.44e-05	1.29796e-05	8.85333e-08		731	-10.4021	5.92843	0.785331
MTZ-09	0.282496	-	1.09559e-05	1.46716	3.14e-05	1.17648e-05	9.75272e-08		731	-10.2237	6.10771	0.775648
MTZ-10	0.282495	-	1.07946e-05	1.46716	3.17e-05	1.51383e-05	7.84701e-08		731	-10.2497	6.08004	0.764234
MTZ-11	0.282489	-	1.23455e-05	1.46719	3.16e-05	1.00878e-05	1.52171e-07		731	-10.4605	5.87133	0.874052
MTZ-12	0.282493	-	1.2525e-05	1.46719	2.42e-05	9.64365e-06	8.71562e-08		731	-10.3146	6.01769	0.886744
MTZ-13	0.282496	-	1.19581e-05	1.46716	2.32e-05	1.17148e-05	9.67467e-08		731	-10.2044	6.12711	0.8466
MTZ-14	0.282499	-	1.18099e-05	1.46717	2.96e-05	1.24658e-05	1.25104e-07		731	-10.1023	6.22898	0.836101
MTZ-15	0.282509	-	1.00361e-05	1.46714	2.84e-05	1.44278e-05	9.39343e-08		731	-9.77425	6.55664	0.710501
MTZ-16	0.282476	-	1.39491e-05	1.46714	2.84e-05	9.24623e-06	9.60155e-08		731	-10.9174	5.41414	0.987627
MTZ-17	0.282501	-	1.23528e-05	1.46715	2.71e-05	1.04025e-05	1.02608e-07		731	-10.0424	6.29	0.874531
MTZ-18	0.282489	-	1.02402e-05	1.46716	2.68e-05	1.29344e-05	9.22057e-08		731	-10.4675	5.86297	0.725001
MTZ-19	0.282494	-	1.21158e-05	1.46718	2.73e-05	1.12428e-05	1.08115e-07		731	-10.2774	6.05423	0.857775
FC1-01	0.282162	0.282174	1.06329e-05	1.46717	3.29e-05	0.000729914	8.84117e-07		1099	-21.5907	2.51178	0.75364
FC1-02	0.28219	0.282202	1.09937e-05	1.46718	2.42e-05	0.00179869	2.28993e-05		1099	-20.607	2.71244	0.779138
FC1-03	0.282157	0.282169	1.04962e-05	1.46717	2.5e-05	0.0010302	6.63228e-06		1099	-21.7673	2.114	0.743967
FC1-04	0.282177	0.28219	1.12107e-05	1.46716	3.06e-05	0.00161323	3.6342e-05		1099	-21.0556	2.39907	0.794549
FC1-05	0.282173	0.282186	1.07302e-05	1.46717	2.63e-05	0.00130321	1.46101e-05		1099	-21.1887	2.49341	0.760507
FC1-06	0.282197	0.282209	1.20505e-05	1.46715	2.87e-05	0.0018624	1.90266e-05		1099	-20.3519	2.92131	0.854008
FC1-07	0.282153	0.282165	1.07525e-05	1.46717	2.61e-05	0.00122555	2.85649e-06		1099	-21.9185	1.8189	0.76214
FC1-08	0.282155	0.282168	1.10924e-05	1.46714	2.06e-05	0.00102662	1.48481e-06		1099	-21.8328	2.05104	0.786231
FC1-09	0.282159	0.282171	1.09559e-05	1.46716	2.99e-05	0.00068546	3.52536e-06		1099	-21.7084	2.42642	0.776541
FC1-10	0.282178	0.282191	1.07946e-05	1.46721	2.08e-05	0.00135749	1.60372e-06		1099	-21.008	2.63474	0.765058
FC1-11	0.282202	0.282215	1.23455e-05	1.46716	3.01e-05	0.00221444	2.88772e-05		1099	-20.1684	2.84659	0.874902
FC1-13	0.282195	0.282207	1.19581e-05	1.46718	3.3e-05	0.00158542	1.11408e-05		1099	-20.4318	3.04485	0.847468
FC1-14	0.28215	0.282162	1.18099e-05	1.46713	2.79e-05	0.000799579	7.66305e-05		1099	-22.0277	2.02252	0.8371
FC1-15	0.282161	0.282173	1.00361e-05	1.46718	2.57e-05	0.000919329	6.42677e-06		1099	-21.6317	2.33141	0.711345
FC1-16	0.282177	0.282189	1.39491e-05	1.46716	2.87e-05	0.00149392	9.84573e-06		1099	-21.0711	2.47114	0.988632
FC1-17	0.282152	0.282164	1.23528e-05	1.46717	2.89e-05	0.000968823	6.0678e-05		1099	-21.9436	1.98242	0.875574
FC1-18	0.282163	0.282176	1.02402e-05	1.46718	2.88e-05	0.000749408	9.21035e-06		1099	-21.5447	2.54352	0.725806
FC1-19	0.282178	0.28219	1.21158e-05	1.46716	2.76e-05	0.00165165	1.13191e-05		1099	-21.027	2.39951	0.858699

## Sheet: (S3) Run 18-03-2020
Sample/spot	176Hf/177Hf	176Hf/177Hf (normalised)	2σ	178Hf/177Hf	2s	176Lu/177Hf	2s		Age (Ma)	e Hf (t = now)	e Hf (t)	2σ
PGF01_2	0.282764	0.282762	3.35275e-05	1.46713	4.85781e-05	0.00160319	0.000129731		240	-0.823753	4.25987	1.18572
PGF01_5	0.282519	0.282517	3.82482e-05	1.46714	4.05658e-05	0.000659433	1.4353e-05		242	-9.48773	-4.21508	1.35384
PGF01_9	0.282724	0.282721	3.87374e-05	1.46714	5.51725e-05	0.00136608	4.3383e-05		232	-2.25786	2.69153	1.37016
PGF01_26	0.282725	0.282722	4.10752e-05	1.46719	5.21422e-05	0.00104237	2.60163e-05		242	-2.21728	2.99793	1.45284
PGF01_30	0.282767	0.282765	4.76516e-05	1.46711	5.45796e-05	0.00190624	4.09148e-05		228	-0.721089	4.062	1.6852
PGF01_35	0.282728	0.282726	3.39488e-05	1.46719	5.39764e-05	0.000778095	2.60767e-05		228	-2.09075	2.86191	1.20077
PGF01_36	0.282729	0.282726	3.88685e-05	1.46715	5.08427e-05	0.00129909	4.36691e-05		246	-2.07526	3.18466	1.37477
PGF01_38	0.282602	0.282599	3.64653e-05	1.46715	5.57013e-05	0.000694161	2.63701e-05		248	-6.56673	-1.16706	1.29035
PGF01_40	0.282729	0.282727	4.3016e-05	1.46714	4.84184e-05	0.00108505	7.73237e-05		238	-2.06301	3.05912	1.52147
PGF01_43	0.28278	0.282778	3.53376e-05	1.46715	5.14982e-05	0.00120599	3.22992e-05		250	-0.257468	5.10465	1.24966
PGF01_48	0.28274	0.282738	3.8272e-05	1.46717	3.98367e-05	0.00139739	0.00010991		249	-1.67608	3.63219	1.35362
PGF01_57	0.282711	0.282709	3.85316e-05	1.46713	4.96327e-05	0.00121883	2.32442e-05		237	-2.6947	2.38452	1.36294
PGF01_64	0.282762	0.28276	4.19955e-05	1.46715	5.22625e-05	0.00138275	5.66073e-05		237	-0.882525	4.17194	1.4852
PGF01_65	0.282727	0.282725	5.09123e-05	1.46715	5.78398e-05	0.00243383	5.49336e-05		244	-2.12865	2.90504	1.80077
PGF01_68	0.282764	0.282762	4.10276e-05	1.46715	4.98794e-05	0.00153093	7.25686e-05		244	-0.824451	4.35581	1.45096
PGF01_73	0.282698	0.282696	3.94199e-05	1.46717	4.83035e-05	0.000783711	3.08587e-05		239	-3.14901	2.0418	1.39443
PGF01_96	0.282725	0.282723	3.80683e-05	1.46716	5.05301e-05	0.00142359	7.83332e-05		239	-2.19405	2.89602	1.34649
081018_12_101	0.282855	0.282853	3.01038e-05	1.46715	4.27398e-05	0.000932053	1.4752e-05		184	2.39183	6.36977	1.06429
081018_12_102	0.282933	0.28293	2.90571e-05	1.46718	4.11719e-05	0.0015681	0.000257637		176.7	5.13937	8.88589	1.02701
081018_12_103	0.282897	0.282894	2.72957e-05	1.46718	3.2983e-05	0.000516158	3.11428e-05		169.6	3.86053	7.57376	0.964872
081018_12_105	0.283019	0.283016	3.63913e-05	1.46717	4.14299e-05	0.00132122	2.9623e-05		181.1	8.17901	12.0498	1.28584
081018_12_106	0.282991	0.282989	2.65965e-05	1.46719	3.02679e-05	0.000770693	2.38952e-05		157.2	7.2	10.6159	0.939843
081018_12_13	0.28296	0.282957	3.66759e-05	1.46714	4.27594e-05	0.000926367	1.72326e-05		183.4	6.09463	10.0618	1.29616
081018_12_16	0.282995	0.282993	3.38173e-05	1.46718	3.30189e-05	0.00101328	7.50796e-06		215	7.34003	11.9806	1.19499
081018_12_17	0.283031	0.283029	3.1478e-05	1.46716	3.29774e-05	0.00149613	4.66514e-05		151	8.61237	11.8214	1.11218
081018_12_2	0.282562	0.28256	2.79206e-05	1.46717	3.92898e-05	0.00103628	7.10897e-06		251.2	-7.9699	-2.55805	0.988133
081018_12_20	0.283008	0.283006	2.91634e-05	1.46718	3.79769e-05	0.00108998	2.45599e-05		168.3	7.81081	11.4331	1.03049
081018_12_26	0.283017	0.283015	2.71216e-05	1.46717	3.66698e-05	0.000812461	3.30142e-05		147.7	8.13251	11.3379	0.95831
081018_12_3	0.282976	0.282974	2.87672e-05	1.46716	3.61998e-05	0.0010574	2.00174e-05		190.1	6.68311	10.7793	1.0166
081018_12_30	0.282876	0.282873	2.62222e-05	1.46712	3.90259e-05	0.00071968	4.0585e-05		218	3.12622	7.87207	0.926996
081018_12_31	0.282887	0.282884	2.90099e-05	1.46717	4.03428e-05	0.000697142	1.13659e-05		215.1	3.51175	8.1977	1.02551
081018_12_32	0.28295	0.282947	3.53038e-05	1.46721	4.29483e-05	0.00092905	1.74273e-05		171.7	5.73119	9.4443	1.24772
081018_12_36	0.28304	0.283037	2.77333e-05	1.46719	3.4615e-05	0.00137118	1.50062e-05		151.2	8.91628	12.1421	0.979846
081018_12_39	0.283022	0.283019	2.98707e-05	1.46716	3.66836e-05	0.000663284	2.91668e-05		148.7	8.28761	11.5295	1.05543
081018_12_40	0.282912	0.28291	2.61301e-05	1.46717	3.64258e-05	0.000882072	2.95721e-05		244	4.41835	9.70628	0.923618
081018_12_41	0.283047	0.283045	3.28507e-05	1.46716	3.74389e-05	0.00127365	5.60545e-05		156.7	9.17948	12.5331	1.16062
081018_12_42	0.28307	0.283067	3.21445e-05	1.46715	3.23685e-05	0.00189873	0.000146604		152.6	9.9793	13.1822	1.13558
081018_12_44	0.283039	0.283036	2.96659e-05	1.46718	3.99772e-05	0.00106317	4.86444e-05		154.9	8.89301	12.2295	1.04813
081018_12_45	0.282844	0.282842	2.8834e-05	1.46714	2.98689e-05	0.000746092	1.84121e-05		248.9	2.0017	7.4172	1.01944
081018_12_46	0.282907	0.282905	2.62387e-05	1.46714	3.02675e-05	0.000420015	2.83803e-06		159.6	4.23438	7.73854	0.927473
081018_12_50	0.282932	0.28293	3.08598e-05	1.46717	3.77068e-05	0.00108789	2.18387e-05		232.4	5.11256	10.1171	1.09072
081018_12_51	0.283033	0.28303	2.8246e-05	1.46717	3.1557e-05	0.00162445	5.28937e-05		197.3	8.66715	12.8456	0.997986
081018_12_53	0.283011	0.283009	3.12017e-05	1.46712	3.90555e-05	0.00132888	4.15329e-05		151.6	7.90554	11.1439	1.1025
081018_12_55	0.283004	0.283002	2.81704e-05	1.46714	3.48014e-05	0.00106806	1.24656e-05		181.1	7.67091	11.5719	0.995412
081018_12_56	0.283009	0.283007	2.49735e-05	1.46716	3.21045e-05	0.000518219	1.09918e-05		191.5	7.84512	12.0403	0.882435
081018_12_57	0.283008	0.283006	2.68832e-05	1.4672	3.59204e-05	0.00138817	6.05662e-05		176.7	7.80869	11.5773	0.949918
081018_12_6	0.282983	0.28298	2.9045e-05	1.4672	3.82544e-05	0.000835159	1.34339e-05		151.1	6.90272	10.1793	1.0264
081018_12_60	0.283014	0.283012	2.89564e-05	1.46718	3.7031e-05	0.000713302	3.06009e-05		150.9	8.02762	11.3124	1.02315
081018_12_61	0.282941	0.282939	2.6885e-05	1.46716	3.62487e-05	0.00149342	5.39762e-05		181.4	5.43635	9.29182	0.950207
081018_12_62	0.282995	0.282993	2.70575e-05	1.46716	4.32412e-05	0.000334787	2.30105e-05		149.6	7.35264	10.6463	0.95612
081018_12_64	0.282902	0.2829	3.14058e-05	1.46715	3.39106e-05	0.000973628	1.2931e-05		242.6	4.0594	9.30201	1.11014
081018_12_65	0.283018	0.283016	2.75164e-05	1.46715	4.35284e-05	0.000746164	3.50081e-05		150	8.15938	11.4214	0.972258
081018_12_70	0.283029	0.283026	2.79279e-05	1.46716	4.05761e-05	0.000805863	4.79235e-05		152	8.52675	11.8264	0.986759
081018_12_71	0.283011	0.283009	3.12444e-05	1.46713	4.07468e-05	0.00149276	3.97402e-05		181.7	7.90477	11.7677	1.10401
081018_12_73	0.283018	0.283015	2.77744e-05	1.46716	3.5172e-05	0.00100204	4.53066e-05		154.3	8.14785	11.4774	0.981373
081018_12_75	0.283002	0.282999	2.87404e-05	1.46718	3.37321e-05	0.00127841	4.89878e-05		184.7	7.5819	11.5348	1.01557
081018_12_78	0.283009	0.283006	3.15129e-05	1.46718	3.78369e-05	0.00089504	6.97396e-06		183.6	7.82043	11.7964	1.1135
081018_12_8	0.28292	0.282917	2.92486e-05	1.46715	3.66209e-05	0.00113108	3.65829e-05		179	4.68363	8.53059	1.03382
081018_12_82	0.283021	0.283019	2.9765e-05	1.46717	4.262e-05	0.000847475	1.87597e-05		175.9	8.2741	12.0887	1.0517
081018_12_84	0.283022	0.28302	3.10118e-05	1.46719	4.35898e-05	0.00234934	0.000149894		162.9	8.31065	11.681	1.09575
081018_12_85	0.282906	0.282904	2.89885e-05	1.46716	3.38025e-05	0.000786178	2.64623e-05		241.9	4.2062	9.46374	1.02468
081018_12_86	0.282895	0.282893	3.45473e-05	1.46715	3.63456e-05	0.00174207	3.0378e-05		250.3	3.8019	9.08389	1.22122
081018_12_87	0.283027	0.283025	3.14063e-05	1.46719	3.04811e-05	0.00124595	2.67795e-05		166.9	8.48123	12.0564	1.10967
081018_12_91	0.283016	0.283014	3.96898e-05	1.46716	3.96591e-05	0.00286302	0.000254951		157.8	8.09597	11.3069	1.4024
081018_12_92	0.282919	0.282916	3.69891e-05	1.46714	4.15514e-05	0.00188363	3.28694e-05		194.6	4.64471	8.73077	1.30742
081018_12_93	0.282704	0.282702	3.75378e-05	1.46717	4.126e-05	0.00165231	0.000112833		205.7	-2.93719	1.41052	1.32782
081018_12_95	0.283006	0.283003	2.71199e-05	1.46719	3.44035e-05	0.000789496	2.56589e-05		149.6	7.72354	10.9724	0.95829
081018_12_96	0.283024	0.283022	3.19706e-05	1.46716	4.28972e-05	0.00100081	2.50336e-05		150	8.38066	11.6174	1.12962
081018_12_97	0.283039	0.283037	3.4775e-05	1.46718	3.52546e-05	0.00290349	2.39781e-05		157.9	8.89414	12.1032	1.22864
081018_12_99	0.282946	0.282943	3.80792e-05	1.46719	3.99363e-05	0.00217496	0.000105961		177	5.59455	9.27656	1.34582
101018_34_100	0.282969	0.282967	3.45594e-05	1.46718	3.98777e-05	0.00142137	6.53871e-05		161.1	6.42951	9.86076	1.22132
101018_34_14	0.283036	0.283033	3.35576e-05	1.46717	3.34104e-05	0.00145078	7.71982e-05		134	8.77542	11.6267	1.18564
101018_34_15	0.283065	0.283063	3.58528e-05	1.46715	4.16739e-05	0.00195601	1.55064e-05		117.1	9.82026	12.2726	1.2666
101018_34_16	0.282962	0.282959	2.86226e-05	1.46717	3.68422e-05	0.000555953	2.54879e-05		124.3	6.16585	8.88321	1.01154
101018_34_17	0.283009	0.283006	4.32618e-05	1.46721	4.31138e-05	0.00289501	4.67345e-05		219	7.83124	12.2859	1.52865
101018_34_23	0.283006	0.283003	3.70003e-05	1.46712	4.15156e-05	0.00219162	5.60724e-05		237.9	7.71993	12.6708	1.30742
101018_34_27	0.282953	0.282951	3.54719e-05	1.46713	4.12251e-05	0.0022114	0.000397124		235.9	5.85286	10.7579	1.25364
101018_34_30	0.282873	0.282871	3.11373e-05	1.46716	4.0121e-05	0.00100002	1.8312e-05		129.6	3.03579	5.83024	1.10076
101018_34_31	0.282919	0.282917	3.01836e-05	1.46713	4.03816e-05	0.00113445	5.96814e-05		164.1	4.65984	8.1856	1.06687
101018_34_40	0.28281	0.282807	3.14357e-05	1.46721	3.07109e-05	0.00109165	9.75633e-06		100.5	0.780329	2.94	1.11156
101018_34_42	0.283035	0.283033	3.8666e-05	1.46716	3.56074e-05	0.00151583	5.21842e-05		124.9	8.77085	11.4228	1.36613
101018_34_44	0.28297	0.282968	2.91135e-05	1.46718	3.99088e-05	0.000989967	7.54239e-05		99.3	6.4563	8.59809	1.02886
101018_34_45	0.282867	0.282865	3.02659e-05	1.46718	3.52324e-05	0.0015493	2.42759e-05		103.8	2.82858	5.02832	1.06998
101018_34_46	0.282817	0.282814	3.05666e-05	1.46717	4.00839e-05	0.00123914	1.91313e-05		152.2	1.03711	4.29498	1.0808
101018_34_47	0.282947	0.282944	2.92065e-05	1.46717	3.88875e-05	0.00130501	2.78295e-05		98.7	5.63157	7.73966	1.03224
101018_34_48	0.282956	0.282953	3.37856e-05	1.46716	3.76313e-05	0.000552944	1.35799e-05		98.9	5.95119	8.11279	1.19403
101018_34_52	0.282938	0.282935	3.27408e-05	1.46715	3.63512e-05	0.00235449	0.000129148		210.7	5.30669	9.66629	1.15718
101018_34_60	0.282967	0.282964	3.6858e-05	1.46718	3.99534e-05	0.00264193	8.08528e-05		215.1	6.34227	10.7527	1.30257
101018_34_66	0.282917	0.282914	2.89135e-05	1.46715	3.49473e-05	0.00101744	8.34659e-05		122.2	4.56967	7.20334	1.02199
101018_34_70	0.282969	0.282967	3.01222e-05	1.46721	3.29785e-05	0.000618642	9.5732e-06		99.6	6.43485	8.60755	1.06451
101018_34_72	0.282954	0.282951	3.26674e-05	1.46715	4.44753e-05	0.000381786	3.28391e-06		97.2	5.88035	8.01574	1.15452
101018_34_76	0.282942	0.28294	2.85622e-05	1.46714	3.61463e-05	0.00090222	6.54645e-05		235.9	5.47401	10.5833	1.00948
101018_34_77	0.28291	0.282907	3.1078e-05	1.46719	4.17923e-05	0.00108353	6.31191e-05		104.2	4.33087	6.57153	1.09852
101018_34_82	0.282894	0.282892	2.83514e-05	1.46713	3.63319e-05	0.0017293	7.52059e-05		233.3	3.77077	8.695	1.0022
101018_34_83	0.282921	0.282918	2.91763e-05	1.46716	3.96954e-05	0.000615875	1.15394e-05		155.4	4.7185	8.11032	1.03126
101018_34_86	0.283009	0.283007	3.05748e-05	1.46716	3.19783e-05	0.00074988	2.60452e-05		153	7.83874	11.1656	1.08036
101018_34_88	0.283119	0.283116	3.26434e-05	1.46718	3.68071e-05	0.000950618	0.000108252		99.3	11.7112	13.8567	1.15301
101018_34_89	0.282897	0.282894	3.34815e-05	1.46716	4.0194e-05	0.0011482	0.000114403		232.5	3.86719	8.86397	1.18353
101018_34_90	0.282966	0.282963	2.67372e-05	1.46717	4.30359e-05	0.000840851	1.8891e-05		228.4	6.29675	11.2529	0.944901
101018_34_96	0.283047	0.283045	2.7613e-05	1.46718	3.90724e-05	0.000803759	1.93834e-05		96.2	9.17987	11.2671	0.975572
101018_34_97	0.28315	0.283148	3.60665e-05	1.46714	3.42109e-05	0.00155766	0.000130973		96.3	12.8373	14.8795	1.27377
101018_34_98	0.282951	0.282949	3.27985e-05	1.46719	3.94593e-05	0.000552879	1.56228e-05		96.4	5.78811	7.89498	1.15917
H7B55_17	0.283013	0.283011	4.29064e-05	1.46711	4.98167e-05	0.00268967	0.000193474		131	7.98458	10.6644	1.63814
H7B55_19	0.282933	0.28293	3.86046e-05	1.46713	4.14988e-05	0.00251637	8.02425e-05		141	5.12952	8.02945	1.49892
H7B55_2	0.282921	0.282919	3.0626e-05	1.46715	5.07999e-05	0.000687556	1.9032e-05		133	4.72375	7.6196	1.24773
H7B55_25	0.282872	0.282869	2.64568e-05	1.46712	4.31653e-05	0.0010758	4.25835e-05		249	2.97318	8.33704	1.12241
H7B55_26	0.28298	0.282978	3.22877e-05	1.46713	4.33291e-05	0.0012671	1.19358e-05		141	6.82168	9.83863	1.2988
H7B55_27	0.282958	0.282955	2.88558e-05	1.4672	4.6016e-05	0.00079516	2.62696e-05		139	6.01942	9.03663	1.19374
H7B55_30	0.28289	0.282888	4.19063e-05	1.46722	5.5739e-05	0.00161095	8.18473e-05		174	3.63828	7.32193	1.60608
H7B55_34	0.282844	0.282841	3.2391e-05	1.46716	4.05043e-05	0.00129907	2.92644e-05		237	1.9824	7.0515	1.3025
H7B55_36	0.282964	0.282962	3.11917e-05	1.46711	4.24259e-05	0.000674607	1.02633e-05		154	6.25154	9.60729	1.26497
H7B55_37	0.282975	0.282973	5.0529e-05	1.46711	5.27395e-05	0.00227426	0.000145177		128	6.63897	9.29205	1.78565
H7B55_41	0.282947	0.282944	3.08484e-05	1.46718	3.92576e-05	0.000780368	1.4068e-05		130	5.63401	8.45674	1.09026
H7B55_42	0.282952	0.28295	2.89406e-05	1.4672	5.25051e-05	0.000787391	2.52547e-05		137	5.82678	8.80116	1.19632
H7B55_52	0.282519	0.282517	2.70482e-05	1.46718	4.73821e-05	0.00159776	1.43237e-05		236	-9.47898	-4.48401	1.14089
H7B55_53	0.282956	0.282953	3.10383e-05	1.46717	3.3617e-05	0.000885595	3.86525e-05		134	5.95759	8.85808	1.26028
H7B55_6	0.282956	0.282954	3.00008e-05	1.46713	3.70018e-05	0.00269969	0.000307086		124	5.97202	8.50701	1.22849
H7B55_69	0.282958	0.282956	2.94429e-05	1.46712	4.05942e-05	0.000968757	2.43603e-05		134	6.03877	8.9319	1.21151
H7B55_73	0.282919	0.282917	4.60673e-05	1.46718	5.11879e-05	0.00194172	4.97982e-05		242	4.6659	9.74072	1.6283
H7B55_74	0.282441	0.282439	2.83066e-05	1.46715	4.50256e-05	0.00117257	1.09199e-05		198	-12.2435	-8.00011	1.17876
H7B55_75	0.282811	0.282808	3.18074e-05	1.46715	4.96976e-05	0.001175	3.81419e-05		239	0.820337	5.95135	1.28451
H7B55_78	0.28292	0.282917	2.40506e-05	1.46714	3.85376e-05	0.000717794	2.32535e-05		251	4.68214	10.1497	1.05246
H7B55_80	0.283003	0.283	3.59664e-05	1.46717	4.05889e-05	0.0017668	7.69106e-05		137	7.60861	10.4948	1.41428
H7B55_88	0.282854	0.282852	4.49792e-05	1.46711	5.72595e-05	0.0025363	0.000118633		143	2.36743	5.3058	1.70697
H7B55_89	0.282901	0.282898	2.91336e-05	1.46716	3.61967e-05	0.000846901	1.85045e-05		243	4.00893	9.28056	1.20231
H7B55_9	0.282954	0.282951	4.65391e-05	1.46716	5.50482e-05	0.000822627	5.52516e-05		133	5.87296	8.75728	1.75793
H7B55_90	0.282969	0.282967	3.55596e-05	1.46715	4.40923e-05	0.00149153	3.67123e-05		130	6.43438	9.1962	1.40151
H7B55_91	0.282909	0.282907	3.41217e-05	1.46711	4.82204e-05	0.00248985	3.39988e-05		128	4.31252	6.9467	1.35636
H7B55_93	0.282921	0.282919	5.00344e-05	1.46717	5.89366e-05	0.00277322	9.33728e-05		121	4.73132	7.19868	1.8742
H7B55_95	0.283042	0.283039	2.78387e-05	1.46713	4.15381e-05	0.000851371	1.53711e-05		132	8.99399	11.855	1.16294
H7B55_96	0.282977	0.282975	3.30788e-05	1.46713	4.62564e-05	0.00152184	4.66787e-05		137	6.70276	9.61087	1.32344
H7B55_97	0.28301	0.283008	4.45484e-05	1.46714	5.96304e-05	0.00162802	3.34641e-05		125	7.88731	10.5319	1.5741
H7B66_1	0.282899	0.282897	2.95577e-05	1.46718	4.11334e-05	0.000527299	1.86949e-06		161	3.9598	7.48323	1.04482
H7B66_14	0.282708	0.282705	3.76553e-05	1.46713	5.06038e-05	0.00112289	4.77547e-05		172	-2.81591	0.878374	1.33196
H7B66_2	0.282976	0.282974	2.88199e-05	1.46716	4.0941e-05	0.000687982	2.48466e-05		162	6.68192	10.211	1.01846
H7B66_23	0.282935	0.282933	5.32099e-05	1.46711	6.04146e-05	0.00216315	0.000124246		183	5.22627	9.03464	1.88065
H7B66_31	0.282982	0.282979	3.05189e-05	1.46715	4.23784e-05	0.000970438	8.77382e-05		171	6.87722	10.5709	1.07848
H7B66_34	0.282834	0.282832	3.02316e-05	1.46716	3.38565e-05	0.0011983	3.76158e-05		231	1.65734	6.61301	1.06889
H7B66_35	0.282928	0.282925	3.42215e-05	1.46714	4.27921e-05	0.000940983	4.65281e-05		155	4.95333	8.30315	1.20956
H7B66_54	0.283007	0.283005	3.95298e-05	1.46716	5.29344e-05	0.0011065	3.62865e-05		186	7.76396	11.766	1.39679
H7B66_61	0.283013	0.283011	5.96859e-05	1.46713	6.29996e-05	0.00142661	2.87494e-05		179	7.97702	11.7903	2.10896
H7B66_64	0.282543	0.28254	3.92408e-05	1.46714	5.82539e-05	0.00204388	0.000134675		180	-8.64619	-4.89173	1.38886
H7B66_70	0.283005	0.283002	3.30238e-05	1.46716	4.96241e-05	0.000631879	2.39786e-05		168	7.67978	11.3465	1.16691
Top Middle Loth_10	0.282965	0.282962	3.34931e-05	1.46719	3.63724e-05	0.0011506	9.91507e-05		166.2	6.27215	9.84193	1.18366
Top Middle Loth_102	0.282416	0.282414	2.44887e-05	1.46717	3.18437e-05	0.00120874	3.60413e-05		139.8	-13.1285	-10.1381	0.867121
Top Middle Loth_103	0.282566	0.282564	2.85929e-05	1.46717	3.6967e-05	0.000807897	1.39111e-05		135.4	-7.82447	-4.89083	1.01191
Top Middle Loth_11	0.282975	0.282973	3.52393e-05	1.46718	4.97308e-05	0.00095446	3.30254e-05		172.5	6.63992	10.3678	1.24532
Top Middle Loth_15	0.283015	0.283013	2.81288e-05	1.46718	4.07267e-05	0.00125824	1.93302e-05		136.4	8.05617	10.9757	0.993906
Top Middle Loth_16	0.282882	0.282879	3.31385e-05	1.46714	4.16307e-05	0.00183096	6.01988e-05		212.8	3.33702	7.81297	1.17147
Top Middle Loth_17	0.28305	0.283047	2.71528e-05	1.46722	3.74224e-05	0.00114027	7.5293e-05		138.5	9.26738	12.2431	0.959302
Top Middle Loth_18	0.282991	0.282989	2.76483e-05	1.46718	3.03021e-05	0.000737185	3.8987e-05		135.6	7.20475	10.1536	0.977012
Top Middle Loth_19	0.282621	0.282618	3.1549e-05	1.4672	3.43476e-05	0.000838581	2.19687e-05		240.7	-5.88916	-0.671529	1.11631
Top Middle Loth_2	0.282968	0.282966	3.00701e-05	1.46722	4.01791e-05	0.000999877	4.29001e-05		129.4	6.40223	9.19335	1.06268
Top Middle Loth_23	0.283152	0.28315	5.28627e-05	1.46721	4.1551e-05	0.00055839	4.13346e-05		136.3	12.9033	15.8853	1.86695
Top Middle Loth_29	0.282882	0.282879	3.03624e-05	1.4672	4.43041e-05	0.00115433	2.60416e-05		243.5	3.33772	8.57031	1.07333
Top Middle Loth_3	0.282946	0.282944	3.062e-05	1.46719	3.69326e-05	0.000714238	2.01354e-05		130.4	5.60964	8.44675	1.0822
Top Middle Loth_30	0.282997	0.282995	3.46225e-05	1.46718	4.36087e-05	0.00121308	2.34515e-05		132.6	7.40991	10.2518	1.22343
Top Middle Loth_32	0.283037	0.283035	2.73084e-05	1.4672	3.58844e-05	0.000865218	3.41219e-05		159.2	8.82904	12.2791	0.964843
Top Middle Loth_33	0.282973	0.282971	4.19095e-05	1.46722	4.821e-05	0.00189223	2.86492e-05		242.1	6.57516	11.6611	1.48105
Top Middle Loth_34	0.282942	0.28294	2.62137e-05	1.46718	4.01089e-05	0.000790588	2.27046e-05		250.3	5.48205	10.9227	0.926477
Top Middle Loth_35	0.283052	0.28305	3.80865e-05	1.4672	4.24998e-05	0.00212031	0.000114186		137.8	9.36609	12.2375	1.34557
Top Middle Loth_36	0.283028	0.283025	3.0902e-05	1.46716	3.76929e-05	0.00130297	3.37413e-05		131.6	8.50212	11.315	1.09184
Top Middle Loth_37	0.283002	0.282999	3.10543e-05	1.4672	4.3671e-05	0.00162941	5.32742e-05		232.6	7.57677	12.5035	1.09733
Top Middle Loth_40	0.283005	0.283002	2.76467e-05	1.46722	4.11676e-05	0.00106885	2.53837e-05		135.1	7.68075	10.5892	0.976907
Top Middle Loth_41	0.283012	0.283009	4.10748e-05	1.46717	5.28465e-05	0.0028751	0.000104139		177.2	7.93024	11.5353	1.45136
Top Middle Loth_43	0.282463	0.28246	2.70273e-05	1.46722	4.62887e-05	0.000785419	2.03056e-05		179.1	-11.4863	-7.6027	0.956855
Top Middle Loth_44	0.283005	0.283002	2.55986e-05	1.46716	3.23445e-05	0.000610844	1.60712e-05		138.6	7.68362	10.7095	0.904536
Top Middle Loth_46	0.282995	0.282993	2.83268e-05	1.46723	3.59505e-05	0.000748291	3.13316e-05		134.4	7.34652	10.2683	1.00097
Top Middle Loth_48	0.282992	0.282989	3.10658e-05	1.4672	3.27713e-05	0.00133805	5.06428e-05		133.2	7.22492	10.0686	1.09777
Top Middle Loth_5	0.283015	0.283012	3.53232e-05	1.46716	5.07356e-05	0.00172551	3.41125e-05		135.5	8.04086	10.8992	1.24812
Top Middle Loth_51	0.282982	0.28298	2.89531e-05	1.46721	3.56114e-05	0.0011137	2.32984e-05		139	6.89723	9.88543	1.02315
Top Middle Loth_52	0.282987	0.282985	3.06361e-05	1.46715	3.72202e-05	0.00141712	0.000100911		138.9	7.06518	10.0234	1.08261
Top Middle Loth_54	0.282908	0.282906	2.89534e-05	1.46717	2.73549e-05	0.000515761	2.22523e-05		139.5	4.27139	7.32471	1.02343
Top Middle Loth_56	0.282914	0.282912	2.7349e-05	1.46716	4.31313e-05	0.0020878	0.000183376		232.9	4.48659	9.34746	0.966696
Top Middle Loth_57	0.28299	0.282987	3.20141e-05	1.46713	3.83107e-05	0.00113496	3.78854e-05		135.5	7.16067	10.0717	1.13129
Top Middle Loth_58	0.282894	0.282892	3.34029e-05	1.46714	4.21314e-05	0.0011127	2.10313e-05		240.3	3.77838	8.94887	1.18077
Top Middle Loth_59	0.28306	0.283057	2.71897e-05	1.46716	4.03738e-05	0.000709747	3.30096e-06		142.1	9.62536	12.7191	0.960571
Top Middle Loth_63	0.283018	0.283015	2.81632e-05	1.46716	2.86408e-05	0.00092047	3.03432e-05		155.3	8.14369	11.5032	0.995113
Top Middle Loth_64	0.282912	0.282909	2.90353e-05	1.46717	3.74511e-05	0.00159706	3.97539e-05		242.8	4.40065	9.54756	1.02631
Top Middle Loth_65	0.282967	0.282965	3.20368e-05	1.4672	3.92756e-05	0.000841154	3.77697e-05		136.4	6.35016	9.3068	1.13218
Top Middle Loth_7	0.282971	0.282969	2.88084e-05	1.46718	3.82776e-05	0.000686737	2.76559e-05		135.8	6.5004	9.45792	1.01808
Top Middle Loth_72	0.28241	0.282407	3.43963e-05	1.46714	3.02919e-05	0.00141164	6.47754e-05		144.5	-13.3546	-10.2829	1.21797
Top Middle Loth_73	0.281934	0.281931	2.47996e-05	1.46715	3.22688e-05	0.000784194	6.09693e-06		137.4	-30.193	-27.2207	0.879631
Top Middle Loth_77	0.282432	0.282429	3.04708e-05	1.46717	3.08416e-05	0.00131985	2.07099e-05		244.3	-12.5819	-7.36746	1.07888
Top Middle Loth_81	0.282449	0.282447	2.57929e-05	1.46717	3.49405e-05	0.000833305	2.87138e-05		132.1	-11.9683	-9.10971	0.913196
Top Middle Loth_82	0.282809	0.282807	3.74152e-05	1.46714	3.83597e-05	0.00191993	0.000138496		236.3	0.764519	5.72084	1.323
Top Middle Loth_84	0.282845	0.282843	3.2719e-05	1.46715	4.27271e-05	0.00124903	0.000112154		135.4	2.04771	4.94482	1.15679
Top Middle Loth_86	0.282974	0.282971	2.78373e-05	1.46717	3.39963e-05	0.00102782	8.22609e-05		178.7	6.57966	10.4331	0.983749
Top Middle Loth_88	0.283033	0.28303	3.50912e-05	1.46714	3.8912e-05	0.00299361	0.000138215		137.1	8.67844	11.4558	1.23984
Top Middle Loth_93	0.28245	0.282448	2.63146e-05	1.4672	3.04551e-05	0.00143712	2.79388e-05		140.3	-11.9338	-8.95351	0.931664
Top Middle Loth_94	0.282446	0.282443	2.82395e-05	1.46714	3.56226e-05	0.00202984	0.000119245		246.7	-12.0867	-6.93661	0.99983
Top Middle Loth_95	0.282963	0.28296	2.82069e-05	1.46717	3.47915e-05	0.000783916	1.56548e-05		248.7	6.20006	11.6073	0.996851
Top Middle Loth_97	0.282912	0.282909	3.14042e-05	1.46717	3.14336e-05	0.0015424	4.11196e-05		133.8	4.38746	7.22503	1.11005

## Sheet: (S3) Standards 18-03-2020
Sample/spot	176Hf/177Hf	176Hf/177Hf (normalised)	2σ	178Hf/177Hf	2s	176Lu/177Hf	2s		Age (Ma)	e Hf (t = now)	e Hf (t)	2σ
MTZ-01	0.282502	-	1.61713e-05	1.46718	2.93586e-05	2.40747e-05	1.13024e-07		731	-10.0055	6.32031	0.572432
MTZ-02	0.282523	-	1.63395e-05	1.46716	2.84337e-05	2.37071e-05	1.06991e-07		731	-9.27188	7.05531	0.578342
MTZ-03	0.282511	-	1.83134e-05	1.46716	2.9515e-05	2.37037e-05	1.26536e-07		731	-9.68531	6.64121	0.648237
MTZ-04	0.282512	-	1.47383e-05	1.4672	3.24423e-05	2.38369e-05	9.32287e-08		731	-9.65928	6.66722	0.521688
MTZ-05	0.282506	-	1.54378e-05	1.46717	3.19406e-05	2.37494e-05	1.09531e-07		731	-9.87969	6.44648	0.546461
MTZ-06	0.282519	-	1.45971e-05	1.46717	2.34452e-05	2.35526e-05	1.23936e-07		731	-9.39134	6.93573	0.516676
MTZ-07	0.282512	-	1.73389e-05	1.4672	3.01675e-05	2.36361e-05	1.08524e-07		731	-9.64853	6.67808	0.613738
MTZ-08	0.282508	-	1.38949e-05	1.46716	2.65391e-05	2.28927e-05	1.12023e-07		731	-9.78606	6.54069	0.49184
MTZ-09	0.282515	-	1.39198e-05	1.46718	3.09798e-05	2.37716e-05	1.04764e-07		731	-9.54724	6.77947	0.492709
MTZ-10	0.282508	-	1.64236e-05	1.46716	2.99837e-05	2.37943e-05	1.10283e-07		731	-9.79826	6.52803	0.581348
MTZ-11	0.282503	-	1.4382e-05	1.46718	3.06768e-05	2.37718e-05	9.91959e-08		731	-9.96344	6.36259	0.509091
MTZ-12	0.282498	-	1.47462e-05	1.46719	3.20384e-05	2.3655e-05	1.26582e-07		731	-10.1359	6.18989	0.521992
MTZ-13	0.282515	-	1.89864e-05	1.46719	2.9218e-05	2.36223e-05	1.21168e-07		731	-9.53468	6.79213	0.672047
MTZ-14	0.28252	-	1.97618e-05	1.46718	3.39202e-05	2.38243e-05	1.27529e-07		731	-9.37964	6.94732	0.699484
MTZ-15	0.282512	-	1.48687e-05	1.4672	3.60997e-05	2.36365e-05	1.14447e-07		731	-9.6517	6.6749	0.526303
MTZ-16	0.282516	-	1.5913e-05	1.46718	3.24681e-05	2.36527e-05	1.22672e-07		731	-9.50974	6.81709	0.563258
MTZ-17	0.282519	-	1.60207e-05	1.46719	2.83711e-05	2.50775e-05	1.1866e-07		731	-9.39745	6.92887	0.567065
MTZ-18	0.282501	-	1.54132e-05	1.46717	3.4255e-05	2.43287e-05	1.17221e-07		731	-10.0584	6.26724	0.545598
MTZ-19	0.282498	-	1.57643e-05	1.46717	2.68713e-05	2.47511e-05	1.00916e-07		731	-10.1488	6.17649	0.558031
MTZ-20	0.282508	-	1.27184e-05	1.46717	2.53433e-05	2.37565e-05	1.13073e-07		731	-9.78062	6.54572	0.450195
MTZ-21	0.282491	-	1.17564e-05	1.46717	2.72572e-05	2.33758e-05	9.09561e-08		731	-10.406	5.91955	0.416171
MTZ-22	0.282507	-	1.26637e-05	1.46718	2.76069e-05	2.3597e-05	9.63039e-08		731	-9.83493	6.49139	0.448262
MTZ-23	0.282497	-	1.39244e-05	1.46717	2.71983e-05	2.37097e-05	8.77176e-08		731	-10.1892	6.13646	0.492906
MTZ-24	0.282502	-	1.31545e-05	1.46717	2.66222e-05	2.34053e-05	9.49172e-08		731	-10.0054	6.32077	0.465643
MTZ-25	0.282527	-	1.5937e-05	1.46719	2.37676e-05	2.30942e-05	1.04028e-07		731	-9.13188	7.19584	0.564089
MTZ-26	0.282511	-	1.26135e-05	1.4672	2.40782e-05	2.30957e-05	1.11123e-07		731	-9.67878	6.64804	0.446479
MTZ-27	0.282526	-	1.61188e-05	1.46717	2.71576e-05	2.29602e-05	1.00772e-07		731	-9.17305	7.15467	0.570524
MTZ-28	0.28251	-	1.50492e-05	1.46716	3.08666e-05	2.3439e-05	1.12243e-07		731	-9.72793	6.59865	0.532695
MTZ-29	0.282496	-	1.37067e-05	1.46717	2.83671e-05	2.32152e-05	9.94731e-08		731	-10.2304	6.09551	0.4852
MTZ-30	0.28251	-	1.55483e-05	1.46721	2.77411e-05	2.29616e-05	1.15903e-07		731	-9.72731	6.5995	0.550363
MTZ-31	0.28251	-	1.0668e-05	1.4672	2.676e-05	2.26624e-05	1.11206e-07		731	-9.73712	6.58983	0.377617
PLS-01	0.282483	0.282481	2.14153e-05	1.46718	2.48484e-05	8.86145e-05	1.40846e-06		337	-10.7653	-3.28822	0.758115
PLS-02	0.282482	0.282479	2.19243e-05	1.46721	2.48737e-05	8.87195e-05	1.47141e-06		337	-10.8083	-3.33128	0.776138
PLS-03	0.282471	0.282468	2.08311e-05	1.46719	2.55285e-05	8.87943e-05	1.51874e-06		337	-11.1997	-3.72296	0.737467
PLS-04	0.282485	0.282483	2.22042e-05	1.4672	2.60602e-05	8.88525e-05	1.56971e-06		337	-10.6941	-3.21702	0.786039
PLS-05	0.282483	0.282481	2.61672e-05	1.46716	3.15238e-05	8.86919e-05	1.35036e-06		337	-10.7565	-3.27938	0.926337
PLS-06	0.282478	0.282476	2.11512e-05	1.46717	2.61297e-05	8.84942e-05	1.31011e-06		337	-10.9419	-3.4649	0.74878
PLS-07	0.28248	0.282478	2.27949e-05	1.4672	2.277e-05	8.82363e-05	1.44054e-06		337	-10.8607	-3.38362	0.806961
PLS-08	0.282479	0.282477	2.19963e-05	1.46717	2.64015e-05	8.85238e-05	1.43542e-06		337	-10.8995	-3.42248	0.778693
PLS-09	0.282483	0.282481	2.28948e-05	1.4672	2.66021e-05	8.9482e-05	1.40043e-06		337	-10.76	-3.2831	0.810491
PLS-10	0.28248	0.282478	2.18264e-05	1.46719	2.599e-05	8.74712e-05	1.26112e-06		337	-10.8738	-3.39648	0.772676
PLS-11	0.28248	0.282477	2.09413e-05	1.46721	2.43691e-05	8.73825e-05	1.55078e-06		337	-10.8837	-3.40644	0.741346
PLS-12	0.282476	0.282473	2.28838e-05	1.4672	3.01996e-05	8.98691e-05	1.45647e-06		337	-11.0189	-3.5423	0.810123
PLS-13	0.282472	0.28247	2.1887e-05	1.46722	2.80038e-05	8.90956e-05	1.44739e-06		337	-11.1442	-3.66745	0.774842
PLS-14	0.282489	0.282487	2.20045e-05	1.4672	3.00049e-05	8.79468e-05	1.45011e-06		337	-10.5377	-3.06025	0.778957
PLS-15	0.282477	0.282474	2.11087e-05	1.46717	2.4852e-05	9.44067e-05	1.61292e-06		337	-10.99	-3.51438	0.74728
PLS-16	0.282482	0.28248	2.2481e-05	1.46718	2.77185e-05	9.15267e-05	1.84501e-06		337	-10.7867	-3.31024	0.795845
PLS-17	0.282489	0.282486	2.14444e-05	1.4672	2.77441e-05	9.22253e-05	1.93446e-06		337	-10.5654	-3.08891	0.759131
PLS-18	0.28248	0.282477	2.14219e-05	1.46719	2.51527e-05	8.92057e-05	1.61143e-06		337	-10.8836	-3.40669	0.75836
PLS-19	0.282472	0.28247	2.07731e-05	1.4672	2.60385e-05	8.83138e-05	1.51131e-06		337	-11.1385	-3.66163	0.735409
PLS-20	0.28249	0.282488	2.2202e-05	1.46718	2.68026e-05	9.3162e-05	5.03995e-07		337	-10.5136	-3.03728	0.785945
PLS-21	0.282472	0.28247	2.10203e-05	1.4672	2.96014e-05	8.95876e-05	1.48129e-06		337	-11.1477	-3.67108	0.744162
PLS-22	0.282482	0.28248	2.30214e-05	1.46718	2.61985e-05	9.05938e-05	1.75575e-06		337	-10.8013	-3.32461	0.814977
FC1-01	0.282168	0.282165	2.31062e-05	1.46719	2.45842e-05	0.000445347	2.00762e-06		1099	-21.9121	2.39867	0.81889
FC1-02	0.282163	0.28216	2.32143e-05	1.46716	2.99576e-05	0.000482162	6.85723e-06		1099	-22.0859	2.19738	0.822736
FC1-03	0.282177	0.282175	2.45612e-05	1.46717	2.66268e-05	0.000706913	1.35027e-06		1099	-21.5787	2.54066	0.870426
FC1-08	0.282157	0.282155	2.51837e-05	1.4672	2.98133e-05	0.00077702	8.33671e-07		1099	-22.2923	1.77377	0.89255
FC1-13	0.282164	0.282162	2.43435e-05	1.46717	2.99417e-05	0.000667496	2.466e-05		1099	-22.0334	2.11386	0.862749
FC1-14	0.282173	0.282171	2.37416e-05	1.46717	3.07275e-05	0.00110595	1.65211e-05		1099	-21.729	2.09676	0.841392
FC1-15	0.282149	0.282146	2.19073e-05	1.46719	2.66303e-05	0.00045742	1.33773e-05		1099	-22.5936	1.70662	0.776452
FC1-16	0.282197	0.282195	2.53374e-05	1.46718	2.86843e-05	0.0013874	0.000114404		1099	-20.8778	2.74325	0.897868

## Sheet: (S4) Run 19-03-2020
Sample/spot	176Hf/177Hf	176Hf/177Hf (normalised)	2σ	178Hf/177Hf	2s	176Lu/177Hf	2s		Age (Ma)	e Hf (t = now)	e Hf (t)	2σ
H7B59_100	0.282999	0.283001	3.41708e-05	1.46713	4.12094e-05	0.00173738	6.07574e-05		250	7.63711	12.9157	1.20745
H7B59_12	0.282997	0.282999	3.97153e-05	1.46718	4.2433e-05	0.00124893	1.14465e-05		249	7.5637	12.9016	1.40337
H7B59_42	0.283024	0.283026	3.60924e-05	1.46718	4.65895e-05	0.00159185	1.58141e-05		244	8.51024	13.6857	1.27523
H7B59_55	0.283011	0.283012	5.14785e-05	1.46717	5.48072e-05	0.00207596	2.56085e-05		248	8.03201	13.2128	1.81895
H7B59_56	0.282687	0.282688	5.37443e-05	1.46713	4.11935e-05	0.00251271	9.1979e-05		168	-3.42193	0.0316019	1.90119
H7B59_62	0.281618	0.281619	4.85325e-05	1.46711	5.81768e-05	0.000970468	9.4113e-06		242	-41.2296	-36.0239	1.72334
H7B59_66	0.282814	0.282816	3.7447e-05	1.46717	5.48675e-05	0.00112432	7.09696e-05		227	1.08223	5.96269	1.32408
H7B59_70	0.282608	0.28261	4.53676e-05	1.46716	5.51492e-05	0.000886379	2.73713e-05		246	-6.19305	-0.868157	1.60531
H7B59_77	0.28257	0.282572	4.97376e-05	1.46711	5.03561e-05	0.00130384	1.72602e-05		132	-7.54442	-4.72776	1.76018
H7B59_88	0.282874	0.282876	5.27714e-05	1.46714	6.40929e-05	0.00206004	0.000148049		244	3.21418	8.31116	1.86553
H7B59_9	0.28248	0.282481	2.88185e-05	1.46716	4.27451e-05	0.000249704	3.54918e-05		135	-10.7463	-7.77243	1.02019
MMD_19_001_102	0.283105	0.283107	5.29708e-05	1.46714	5.96164e-05	0.00260664	0.000138259		241.7	11.3797	16.3454	1.87105
MMD_19_001_132	0.283091	0.283092	4.13491e-05	1.46713	4.22066e-05	0.00204374	7.19658e-05		242.8	10.8663	15.9449	1.46062
MMD_19_001_136	0.283002	0.283004	3.23256e-05	1.46719	5.04908e-05	0.000944937	3.73801e-05		234	7.74616	12.8088	1.14223
MMD_19_001_182	0.283006	0.283008	3.73243e-05	1.46709	4.81979e-05	0.00114666	5.00935e-05		232.2	7.8637	12.8563	1.31885
MMD_19_001_185	0.282991	0.282993	5.8424e-05	1.46713	6.6014e-05	0.000946756	6.38543e-05		228.4	7.33748	12.2781	2.06451
MMD_19_001_191	0.282996	0.282998	5.65275e-05	1.46712	7.3007e-05	0.00180637	0.000100878		236.9	7.51415	12.5045	1.99746
MMD_19_001_206	0.282837	0.282838	2.7251e-05	1.46713	3.48325e-05	0.000875879	7.07781e-06		243.9	1.88188	7.16727	0.963484
MMD_19_001_60	0.283027	0.283029	3.62237e-05	1.4672	4.71736e-05	0.00154794	3.08546e-05		243.2	8.614	13.7796	1.27986
MMD_19_001_86	0.282989	0.28299	2.95968e-05	1.46721	3.93039e-05	0.000747042	3.71477e-06		242	7.25552	12.5231	1.04586
MV16_1	0.282928	0.28293	1.85444e-05	1.46716	3.13559e-05	0.000920403	3.20447e-05		138.7	5.12319	8.12212	0.907692
MV16_12	0.28292	0.282921	2.27804e-05	1.46713	4.15756e-05	0.00118827	2.21646e-05		133.1	4.82006	7.67406	1.02109
MV16_13	0.282928	0.282929	1.93402e-05	1.46717	3.52268e-05	0.00103145	2.98268e-05		210.2	5.09598	9.62916	0.928207
MV16_14	0.282919	0.282921	1.84918e-05	1.4672	3.49298e-05	0.000877896	4.4284e-05		143	4.78976	7.88572	0.906366
MV16_16	0.28291	0.282911	2.12739e-05	1.46717	3.68604e-05	0.00100169	1.74588e-05		142	4.46121	7.52377	0.979668
MV16_17	0.282922	0.282924	2.25572e-05	1.46715	3.66156e-05	0.00100355	4.78335e-05		140.1	4.9108	7.93228	1.01487
MV16_18	0.282926	0.282927	2.37167e-05	1.46715	3.88705e-05	0.00126684	6.62476e-05		140.3	5.03244	8.03385	1.04737
MV16_19	0.282914	0.282916	2.22563e-05	1.4672	3.12558e-05	0.00110797	1.22061e-05		146.2	4.624	7.76706	1.00656
MV16_2	0.28293	0.282932	2.38457e-05	1.46719	2.90586e-05	0.000899988	6.37511e-05		132.6	5.18767	8.05631	1.05101
MV16_21	0.282927	0.282929	1.97898e-05	1.46718	3.11799e-05	0.000805992	7.66186e-05		140.3	5.09374	8.13793	0.93997
MV16_22	0.282937	0.282939	2.58289e-05	1.46715	3.47522e-05	0.00106445	1.82321e-05		138.1	5.42378	8.39665	1.10799
MV16_23	0.282924	0.282926	1.99092e-05	1.46717	3.83074e-05	0.000934704	2.49428e-05		143	4.97392	8.06458	0.943121
MV16_24	0.2829	0.282901	2.57743e-05	1.46721	3.45773e-05	0.00130896	0.000225115		142.2	4.10485	7.14271	1.1065
MV16_25	0.282915	0.282916	1.76839e-05	1.46713	3.39648e-05	0.000739842	1.76382e-05		138.6	4.63632	7.64949	0.885999
MV16_27	0.282917	0.282919	2.43109e-05	1.46717	3.58869e-05	0.00100207	3.58369e-05		139.5	4.72922	7.73782	1.06427
MV16_29	0.282919	0.28292	2.30876e-05	1.46714	3.71444e-05	0.000688195	1.98788e-05		137.6	4.77627	7.7724	1.02968
MV16_3	0.282921	0.282923	2.28215e-05	1.46716	2.60763e-05	0.000969069	4.30718e-05		140.4	4.87006	7.9012	1.02223
MV16_30	0.282932	0.282934	2.45342e-05	1.4672	4.02396e-05	0.000629462	1.44935e-05		139.7	5.271	8.31851	1.07062
MV16_31	0.282881	0.282883	2.03276e-05	1.46717	3.83036e-05	0.000980432	4.33251e-05		142	3.44906	6.51329	0.95429
MV16_32	0.282882	0.282884	1.95729e-05	1.46719	3.14279e-05	0.000517426	6.8547e-06		158.5	3.47956	6.94905	0.934364
MV16_34	0.282928	0.282929	1.89274e-05	1.46721	3.04987e-05	0.00082169	1.5909e-05		137.1	5.10435	8.07757	0.917514
MV16_35	0.282942	0.282944	2.19303e-05	1.46717	3.22293e-05	0.000782737	6.58081e-05		137.1	5.61852	8.59543	0.997519
MV16_36	0.282938	0.28294	2.42046e-05	1.46716	3.16569e-05	0.00108804	3.39103e-05		140.5	5.47505	8.4975	1.06119
MV16_37	0.282927	0.282928	2.40301e-05	1.46718	3.01588e-05	0.00101762	1.71556e-05		142.1	5.06284	8.12624	1.05625
MV16_38	0.282922	0.282924	2.48993e-05	1.46714	3.1778e-05	0.00079902	1.17527e-05		140.8	4.90047	7.95611	1.08112
MV16_39	0.282929	0.28293	2.03406e-05	1.46715	2.74421e-05	0.000828463	2.49297e-05		136.9	5.13719	8.10546	0.954545
MV16_4	0.282926	0.282927	2.10258e-05	1.46718	4.23712e-05	0.00108998	4.44485e-05		136.5	5.02926	7.96521	0.97292
MV16_40	0.282921	0.282923	2.05122e-05	1.46717	3.52727e-05	0.00102667	1.30815e-05		138.4	4.87644	7.85907	0.959135
MV16_41	0.282913	0.282915	1.99291e-05	1.46717	3.42723e-05	0.000991584	3.89517e-05		142.5	4.59474	7.66909	0.943667
MV16_42	0.282912	0.282914	2.28723e-05	1.46715	3.60066e-05	0.00117683	7.81499e-05		140.4	4.55406	7.56582	1.02367
MV16_44	0.282935	0.282937	2.27968e-05	1.46719	3.82717e-05	0.000722259	1.72308e-05		138.7	5.37188	8.38906	1.02151
MV16_45	0.282912	0.282914	2.95983e-05	1.46716	3.64392e-05	0.00161926	5.07463e-05		138.5	4.5406	7.47102	1.22018
MV16_46	0.282922	0.282923	2.29232e-05	1.46714	3.12528e-05	0.000979857	6.11496e-05		138.4	4.88689	7.87381	1.02507
MV16_47	0.282925	0.282927	2.39701e-05	1.46716	4.01136e-05	0.000962456	2.78186e-05		136.8	5.02285	7.97679	1.05455
MV16_48	0.282928	0.28293	1.92861e-05	1.46717	3.78185e-05	0.00109583	4.2391e-05		142.8	5.12715	8.19831	0.926799
MV16_49	0.282931	0.282933	2.43999e-05	1.46712	3.28177e-05	0.00105019	2.10968e-05		146.4	5.22549	8.37866	1.06678
MV16_50	0.282909	0.282911	2.51543e-05	1.46717	3.73076e-05	0.001031	2.12042e-05		134.1	4.44426	7.33357	1.08851
MV16_51	0.282953	0.282955	2.39372e-05	1.46715	3.96305e-05	0.000904579	2.92238e-05		140.3	5.99726	9.03258	1.05355
MV16_52	0.28292	0.282922	2.21402e-05	1.46714	3.59731e-05	0.000948624	1.1718e-05		136.7	4.84137	7.79435	1.00334
MV16_53	0.282942	0.282944	2.64831e-05	1.46721	3.75642e-05	0.00141479	0.000111189		136	5.60041	8.49655	1.12711
MV16_54	0.282924	0.282926	2.92795e-05	1.46718	3.08212e-05	0.00121623	5.8487e-05		147	4.97219	8.12207	1.03488
MV16_56	0.282941	0.282943	2.51039e-05	1.46719	3.54984e-05	0.0012369	2.97354e-05		139.2	5.58353	8.5643	1.08697
MV16_57	0.282913	0.282915	2.32766e-05	1.46718	2.97057e-05	0.000618801	1.56947e-05		140.5	4.57812	7.64388	1.03499
MV16_59	0.282966	0.282968	3.17529e-05	1.46716	3.90644e-05	0.00264035	0.000236353		139.5	6.45416	9.31216	1.28588
MV16_6	0.282931	0.282933	2.11102e-05	1.46717	3.96129e-05	0.000818349	1.861e-05		140.6	5.22376	8.27335	0.975189
MV16_60	0.282922	0.282924	2.21812e-05	1.46719	3.227e-05	0.00094954	3.65939e-05		145	4.90359	8.0361	1.00447
MV16_61	0.282941	0.282943	2.76015e-05	1.46718	3.48001e-05	0.001295	3.69758e-05		141.8	5.58598	8.61707	1.16014
MV16_62	0.282912	0.282914	2.34266e-05	1.46716	3.22164e-05	0.000991143	4.24698e-05		149.2	4.55161	7.77078	1.03921
MV16_63	0.282925	0.282927	2.0582e-05	1.46714	3.27468e-05	0.000692241	1.76253e-05		144.9	5.00688	8.16191	0.960992
MV16_64	0.282947	0.282949	1.91949e-05	1.46717	3.88336e-05	0.00121574	2.16501e-05		139.3	5.79946	8.78438	0.924397
MV16_66	0.282941	0.282942	2.23312e-05	1.46718	3.69688e-05	0.000897939	6.01648e-05		140.2	5.55846	8.59209	1.00857
MV16_68	0.282951	0.282953	1.99958e-05	1.46719	3.48151e-05	0.00114138	4.20272e-05		141.5	5.92647	8.96561	0.945358
MV16_70	0.282931	0.282932	1.98692e-05	1.46719	3.43145e-05	0.000922477	5.54784e-05		140.4	5.20385	8.23943	0.942055
MV16_71	0.28294	0.282942	2.73361e-05	1.46716	4.16598e-05	0.00146395	7.41214e-05		139	5.54378	8.49937	1.15227
MV16_72	0.282924	0.282926	3.02432e-05	1.46716	4.05321e-05	0.000769336	1.66939e-05		137.6	4.98638	7.97519	1.23973
MV16_74	0.282938	0.28294	2.15557e-05	1.46718	3.45189e-05	0.00115677	2.92163e-05		134.5	5.47043	8.35749	0.987274
MV16_75	0.282942	0.282943	2.58603e-05	1.46718	3.91146e-05	0.00112779	2.21315e-05		138.9	5.59845	8.58281	1.1089
MV16_76	0.282925	0.282927	2.27876e-05	1.46718	3.12724e-05	0.00121613	2.65414e-05		138.8	5.01994	7.99386	1.02128
MV16_77	0.282941	0.282942	2.52054e-05	1.46714	3.67018e-05	0.0013178	0.000100113		134.8	5.55497	8.43415	1.0899
MV16_78	0.282925	0.282926	1.94718e-05	1.46716	2.9189e-05	0.000803092	3.43233e-05		135.5	4.99155	7.93165	0.931644
MV16_79	0.282946	0.282947	2.44727e-05	1.46712	3.69748e-05	0.0012738	5.9441e-05		140.4	5.7353	8.73842	1.06883
MV16_8	0.282924	0.282926	2.37539e-05	1.46717	3.66234e-05	0.00107853	2.60202e-05		139.8	4.9696	7.97768	1.04843
MV16_80	0.282947	0.282949	1.95797e-05	1.46713	2.34246e-05	0.000761032	3.17674e-05		141.7	5.79789	8.87693	0.934421
MV16_81	0.282921	0.282923	2.26049e-05	1.46715	3.33357e-05	0.00111644	2.01111e-05		140	4.87425	7.8831	1.0162
MV16_83	0.282923	0.282924	2.14124e-05	1.46717	4.06597e-05	0.000888866	1.29727e-05		140.4	4.92018	7.95879	0.983405
MV16_84	0.282923	0.282925	2.52454e-05	1.46714	3.44413e-05	0.000983013	2.37262e-05		151	4.92942	8.18845	1.0911
MV16_85	0.282929	0.282931	2.49951e-05	1.46716	3.67393e-05	0.00129145	7.80193e-05		144.6	5.15167	8.24291	1.08386
MV16_87	0.282923	0.282925	2.00228e-05	1.46715	3.8616e-05	0.00111996	3.21316e-05		148.5	4.94024	8.13176	0.946125
MV16_88	0.282925	0.282926	2.42245e-05	1.46717	3.88794e-05	0.00101875	5.1775e-05		142.8	4.99686	8.07525	1.06179
MV16_89	0.282949	0.282951	2.80496e-05	1.46717	4.27855e-05	0.0013788	0.000129985		139.5	5.86367	8.83787	1.17347
MV16_92	0.282938	0.28294	2.33359e-05	1.46722	3.84908e-05	0.00144844	4.4927e-05		135.7	5.47606	8.36275	1.0366
MV16_93	0.282941	0.282942	2.34609e-05	1.46716	3.3287e-05	0.000877344	2.01154e-05		143.7	5.56417	8.67562	1.04011
MV16_94	0.282938	0.28294	2.2933e-05	1.46716	3.53646e-05	0.000966321	2.78483e-05		136.5	5.47042	8.41767	1.0253
MV16_95	0.282933	0.282934	1.91452e-05	1.46717	4.09941e-05	0.000943005	2.88998e-05		143.2	5.27979	8.37409	0.923135
MV16_96	0.282962	0.282963	2.57563e-05	1.46715	4.13315e-05	0.00143518	0.000107215		141.2	6.30482	9.31019	1.10581
MV16_97	0.282946	0.282948	2.33881e-05	1.46716	4.07168e-05	0.00142619	0.000105504		138	5.74876	8.68657	1.03805
MV16_98	0.282934	0.282936	2.58553e-05	1.46716	3.46061e-05	0.00105741	6.27108e-05		138.2	5.32936	8.305	1.10877
MV16_99	0.282924	0.282926	2.38345e-05	1.46716	3.89254e-05	0.000775619	1.45722e-05		138.3	4.98762	7.99108	1.05071
MV17_2	0.282965	0.282967	3.18163e-05	1.46719	3.61024e-05	0.00174199	4.87613e-05		135.5	6.43747	9.29389	1.12438
MV17_21	0.283005	0.283007	3.48536e-05	1.46714	3.896e-05	0.00205679	5.69548e-05		128.2	7.84641	10.5224	1.23155
MV17_23	0.283017	0.283019	2.83985e-05	1.46717	3.55793e-05	0.00118432	3.01035e-05		161.8	8.25373	11.7259	1.00341
MV17_24	0.282991	0.282993	2.87927e-05	1.46719	3.85565e-05	0.00111349	0.000101552		166.5	7.34697	10.9277	1.01744
MV17_26	0.28295	0.282952	2.68115e-05	1.46718	3.59039e-05	0.00102321	1.92362e-05		168.2	5.9042	9.53106	0.947564
MV17_27	0.282936	0.282938	3.0628e-05	1.46717	3.55846e-05	0.00138382	2.03972e-05		128.8	5.40624	8.15141	1.0825
MV17_28	0.282964	0.282966	2.64252e-05	1.46718	3.21186e-05	0.00134426	4.79934e-05		158.1	6.39926	9.77454	0.933865
MV17_29	0.282984	0.282986	2.60428e-05	1.46717	3.2495e-05	0.000792822	1.76869e-05		166.3	7.1042	10.7158	0.920284
MV17_3	0.28297	0.282972	2.53309e-05	1.46719	3.37603e-05	0.000611899	1.43873e-05		150.4	6.60601	9.88954	0.895175
MV17_32	0.28271	0.282711	3.27182e-05	1.46721	3.37149e-05	0.000724562	3.37395e-05		213.5	-2.60708	2.03715	1.1573
MV17_39	0.282938	0.28294	2.82804e-05	1.46719	3.20314e-05	0.000884308	2.40912e-05		166.1	5.45905	9.05564	0.999521
MV17_4	0.283025	0.283027	2.65042e-05	1.46719	3.5265e-05	0.00100899	2.80651e-05		160.6	8.55255	12.0177	0.936455
MV17_42	0.282978	0.28298	2.6284e-05	1.46714	3.11764e-05	0.000460596	9.49524e-06		165.1	6.88108	10.5028	0.928832
MV17_44	0.282985	0.282986	2.73151e-05	1.46717	3.10338e-05	0.000859937	3.92333e-05		164.2	7.11013	10.6688	0.965244
MV17_47	0.28294	0.282942	2.60376e-05	1.46717	3.36533e-05	0.00111818	5.07037e-05		173.4	5.55163	9.27981	0.920245
MV17_48	0.282963	0.282964	2.63684e-05	1.46715	3.42497e-05	0.000377795	2.96035e-06		158.4	6.33521	9.81814	0.931865
MV17_49	0.28299	0.282992	3.0109e-05	1.4672	3.53075e-05	0.000903271	7.04595e-05		167.7	7.29976	10.9296	1.06395
MV17_50	0.283012	0.283013	2.74732e-05	1.46717	4.01289e-05	0.000550299	1.65648e-05		161.5	8.06887	11.6023	0.970741
MV17_51	0.28298	0.282982	2.81015e-05	1.46715	3.27986e-05	0.000677945	4.24928e-05		175.9	6.95679	10.7906	0.993049
MV17_53	0.283005	0.283007	2.35536e-05	1.46718	3.19057e-05	0.000487635	8.75425e-06		168.5	7.83631	11.5301	0.832264
MV17_54	0.283006	0.283007	2.75466e-05	1.46712	4.20003e-05	0.00110311	0.000112227		166.1	7.85955	11.433	0.973354
MV17_55	0.282853	0.282855	3.15738e-05	1.46721	3.92459e-05	0.00222129	7.07292e-05		206	2.46739	6.74636	1.11625
MV17_58	0.282843	0.282844	2.94913e-05	1.46718	3.27305e-05	0.000759131	2.13312e-05		214.1	2.09806	6.75271	1.04267
MV17_59	0.28299	0.282992	2.62972e-05	1.46717	3.2461e-05	0.000802063	3.07663e-05		171.4	7.29901	11.0206	0.929257
MV17_6	0.282999	0.283001	2.69252e-05	1.46717	3.62952e-05	0.000973958	2.28461e-05		170.3	7.61606	11.2945	0.951418
MV17_63	0.282979	0.282981	2.64926e-05	1.46717	3.29385e-05	0.00111406	2.26907e-05		155.6	6.9268	10.2725	0.936198
MV17_65	0.282969	0.282971	2.96402e-05	1.46715	3.9311e-05	0.00116931	3.53455e-05		177.5	6.55491	10.3658	1.04747
MV17_66	0.282936	0.282937	2.93974e-05	1.46718	3.72427e-05	0.00220586	0.000132593		159.8	5.37824	8.69845	1.03901
MV17_9	0.283004	0.283006	2.78034e-05	1.46719	3.77448e-05	0.000663784	1.19744e-06		163.6	7.81362	11.3807	0.982432
MV1_11	0.282872	0.282874	3.2455e-05	1.46714	3.36304e-05	0.000874907	8.45608e-06		184.1	3.14071	7.12809	1.14733
MV1_119	0.282777	0.282779	3.12623e-05	1.46713	4.01274e-05	0.00127787	2.03016e-05		245.4	-0.226863	5.02465	1.10554
MV1_120	0.28272	0.282722	3.72848e-05	1.4672	3.81382e-05	0.00136273	6.09955e-06		187.8	-2.22668	1.77815	1.31878
MV1_121	0.282667	0.282668	2.87647e-05	1.46717	3.97021e-05	0.000778099	1.17369e-05		192.2	-4.13117	0.0412362	1.01761
MV1_122	0.282908	0.28291	3.20721e-05	1.46718	4.33052e-05	0.000962724	3.76181e-05		186.2	4.4083	8.43097	1.13365
MV1_14	0.282777	0.282779	3.34512e-05	1.46716	3.4644e-05	0.00160293	2.6477e-05		190.4	-0.234384	3.79659	1.18295
MV1_17	0.28266	0.282661	2.99995e-05	1.46718	3.09737e-05	0.000898018	1.9112e-05		196	-4.37352	-0.134095	1.06132
MV1_21	0.282726	0.282728	2.73293e-05	1.46717	3.51882e-05	0.00127943	2.05837e-05		187.5	-2.03272	1.97611	0.966629
MV1_26	0.282601	0.282602	2.8515e-05	1.46718	3.47528e-05	0.00152399	2.87838e-05		185	-6.4595	-2.53599	1.00901
MV1_35	0.282669	0.282671	3.29108e-05	1.46716	3.6037e-05	0.00145003	3.14795e-05		183.3	-4.03957	-0.142233	1.16428
MV1_37	0.282862	0.282864	2.9846e-05	1.4672	3.85757e-05	0.000977243	4.60569e-05		233.3	2.77799	7.81786	1.05514
MV1_46	0.282721	0.282722	2.69162e-05	1.46717	2.7301e-05	0.00132577	7.40496e-06		195	-2.21802	1.94547	0.952037
MV1_47	0.282883	0.282885	3.38798e-05	1.46717	3.47774e-05	0.00193031	4.8203e-05		238.4	3.53677	8.53709	1.19765
MV1_49	0.282854	0.282855	2.95611e-05	1.46718	3.19557e-05	0.00157676	4.61106e-05		228	2.48753	7.32198	1.0451
MV1_56	0.282849	0.282851	3.25831e-05	1.46716	4.29308e-05	0.00181182	0.000111996		187.7	2.3182	6.26701	1.15195
MV1_59	0.282869	0.28287	4.19574e-05	1.46715	4.38336e-05	0.00157239	6.0996e-05		187.2	3.01763	6.98584	1.48327
MV1_63	0.282895	0.282897	3.67158e-05	1.4672	4.02448e-05	0.00208006	2.41397e-05		186.4	3.95704	7.84604	1.29785
MV1_71	0.282901	0.282903	3.11373e-05	1.46718	3.94962e-05	0.0010566	1.16289e-05		184.1	4.15415	8.11981	1.10064
MV1_75	0.282684	0.282685	2.60189e-05	1.46713	3.30444e-05	0.000660748	1.30311e-05		202.3	-3.5324	0.875757	0.92042
MV1_85	0.282724	0.282726	2.85e-05	1.46716	3.90383e-05	0.00110554	1.18124e-05		190.1	-2.10637	1.98001	1.00805
MV1_89	0.282915	0.282917	2.8381e-05	1.46714	3.64654e-05	0.00158947	4.38641e-05		195.6	4.65042	8.7956	1.00316
MV6_1	0.282882	0.282884	2.52463e-05	1.46717	3.66906e-05	0.00165074	2.99532e-05		230.2	3.49634	8.3668	1.09123
MV6_10	0.282976	0.282978	2.28406e-05	1.46716	3.62905e-05	0.000782258	1.38657e-05		164	6.81159	10.3742	1.02264
MV6_11	0.282996	0.282997	2.09204e-05	1.46717	2.8911e-05	0.000637849	6.51397e-06		166.5	7.50378	11.137	0.969939
MV6_12	0.282992	0.282993	2.23141e-05	1.46717	3.97067e-05	0.00085183	4.5918e-05		163.8	7.36566	10.9166	1.00799
MV6_15	0.283006	0.283008	1.99797e-05	1.46722	3.09194e-05	0.000798879	3.27723e-05		167.2	7.87102	11.5018	0.944829
MV6_16	0.282994	0.282995	2.03344e-05	1.46719	3.49429e-05	0.000892505	1.4908e-05		164.2	7.43145	10.9866	0.954256
MV6_17	0.283024	0.283026	2.54443e-05	1.46715	3.48467e-05	0.00148495	3.69155e-05		161.7	8.51665	11.9546	1.09659
MV6_18	0.283016	0.283018	2.43202e-05	1.46717	3.51929e-05	0.000777563	1.79713e-05		165.8	8.23139	11.8342	1.0643
MV6_19	0.283019	0.283021	1.91932e-05	1.46717	3.72822e-05	0.000874113	3.85679e-05		164.8	8.32373	11.8943	0.924226
MV6_20	0.282993	0.282995	2.04491e-05	1.4672	3.62153e-05	0.000841847	1.59499e-05		167.1	7.42501	11.0487	0.957312
MV6_21	0.283003	0.283004	2.15317e-05	1.46717	4.15834e-05	0.000822089	9.99658e-06		171.7	7.74924	11.4753	0.986486
MV6_22	0.282993	0.282995	1.82027e-05	1.46717	3.24731e-05	0.00040513	1.02603e-05		167.5	7.40461	11.0854	0.898904
MV6_23	0.282999	0.283001	2.09005e-05	1.46718	3.90261e-05	0.000632112	1.63542e-05		158	7.62113	11.0691	0.969397
MV6_24	0.283015	0.283016	2.4453e-05	1.4672	3.52811e-05	0.000797108	1.98246e-05		169.3	8.1709	11.8477	1.06809
MV6_25	0.282983	0.282985	1.90342e-05	1.46717	4.11054e-05	0.000817996	2.01169e-05		164.2	7.06897	10.6321	0.920174
MV6_26	0.283021	0.283023	2.28957e-05	1.46716	3.62129e-05	0.00144298	8.39775e-06		167.9	8.41356	11.9883	1.02408
MV6_29	0.282996	0.282998	2.15388e-05	1.46714	3.66587e-05	0.00071045	1.20787e-05		162.2	7.52531	11.0567	0.986692
MV6_3	0.282987	0.282988	2.11953e-05	1.46717	3.07386e-05	0.00107834	1.42521e-05		169.8	7.18394	10.8397	0.97738
MV6_30	0.283001	0.283003	2.14654e-05	1.46717	3.81847e-05	0.000701945	2.21303e-05		172.1	7.70951	11.4579	0.984683
MV6_31	0.283014	0.283016	2.25678e-05	1.46714	3.41183e-05	0.000731774	1.48232e-05		170.4	8.16738	11.8755	1.01497
MV6_32	0.283007	0.283009	2.61815e-05	1.4672	3.58472e-05	0.00121778	4.21849e-05		163.5	7.91038	11.4154	1.11809
MV6_33	0.283005	0.283007	2.36187e-05	1.46715	3.24123e-05	0.000777569	2.24452e-05		166.5	7.85122	11.4691	1.04441
MV6_34	0.282999	0.283	1.8337e-05	1.46719	3.42685e-05	0.000828987	1.33207e-05		164.6	7.6075	11.1784	0.902296
MV6_35	0.283017	0.283019	2.38815e-05	1.46718	4.212e-05	0.000925826	4.13385e-05		163.5	8.26975	11.8065	1.05182
MV6_36	0.282996	0.282998	2.12837e-05	1.46718	3.47696e-05	0.000949488	9.45984e-05		176.7	7.52548	11.3453	0.979756
MV6_37	0.283023	0.283024	2.236e-05	1.46717	4.02239e-05	0.000932622	1.54222e-05		163	8.46353	11.9887	1.00919
MV6_38	0.282998	0.282999	2.30671e-05	1.46718	4.37814e-05	0.000834686	1.26875e-05		164.3	7.57348	11.1372	1.02892
MV6_39	0.282995	0.282997	2.38939e-05	1.46716	3.81937e-05	0.00161319	4.8027e-05		169.2	7.48769	11.0707	1.05222
MV6_4	0.282989	0.282991	1.98572e-05	1.46719	2.94308e-05	0.000880728	7.9464e-06		169.3	7.26955	10.9366	0.941631
MV6_40	0.283007	0.283008	2.11556e-05	1.46719	2.86318e-05	0.00099841	6.37138e-05		168.1	7.89223	11.5204	0.976266
MV6_41	0.282993	0.282994	1.65913e-05	1.4672	3.15835e-05	0.000630671	1.07698e-05		166.9	7.39903	11.0417	0.859081
MV6_44	0.283017	0.283019	1.97067e-05	1.46719	2.97417e-05	0.000869788	1.96179e-05		172.3	8.27284	12.0067	0.937624
MV6_45	0.282993	0.282995	2.09772e-05	1.46719	3.25301e-05	0.00106013	3.01542e-05		173.7	7.40678	11.1488	0.971474
MV6_46	0.282877	0.282879	3.64241e-05	1.46717	3.98713e-05	0.00264369	0.000154546		185.9	3.30794	7.11689	1.43258
MV6_47	0.28301	0.283011	2.14999e-05	1.46717	3.51963e-05	0.000751558	2.39955e-05		173.2	8.00269	11.7695	0.985604
MV6_48	0.283017	0.283019	2.39998e-05	1.46716	3.291e-05	0.00133356	7.18308e-05		164.3	8.26533	11.7751	1.05517
MV6_49	0.282979	0.282981	2.46413e-05	1.46717	2.83766e-05	0.000660469	2.45473e-05		163.8	6.91132	10.4828	1.07357
MV6_5	0.283011	0.283012	2.37879e-05	1.46716	3.81654e-05	0.000917759	2.68394e-05		178.2	8.03075	11.887	1.04918
MV6_51	0.283019	0.283021	2.07709e-05	1.46719	3.35385e-05	0.00076645	1.07391e-05		163.3	8.34331	11.8929	0.965872
MV6_52	0.282994	0.282996	1.99919e-05	1.46714	4.23604e-05	0.000610786	4.60217e-05		173.2	7.45595	11.2387	0.945175
MV6_53	0.283002	0.283004	2.0865e-05	1.46716	3.18381e-05	0.000781807	3.56767e-05		167	7.72677	11.355	0.968436
MV6_54	0.283026	0.283028	2.36138e-05	1.46716	2.99557e-05	0.00163527	4.7894e-05		171.5	8.57266	12.2024	1.04422
MV6_55	0.282989	0.282991	2.3475e-05	1.46718	4.11571e-05	0.000734097	2.67317e-05		171.9	7.26389	11.0041	1.0404
MV6_57	0.283014	0.283016	2.30748e-05	1.46717	3.50865e-05	0.00062139	1.49209e-05		162.3	8.16865	11.712	1.0291
MV6_58	0.282992	0.282994	3.0793e-05	1.46718	4.06497e-05	0.00103241	3.56093e-05		170.5	7.39119	11.0673	1.2563
MV6_59	0.282989	0.28299	1.80328e-05	1.46717	3.02479e-05	0.000908698	3.76705e-05		162.2	7.25356	10.7636	0.894624
MV6_62	0.282976	0.282977	2.19186e-05	1.46718	3.67286e-05	0.000696796	1.90199e-05		176.2	6.79746	10.6356	0.997127
MV6_63	0.283009	0.283011	2.10356e-05	1.46718	3.6556e-05	0.000547048	1.08365e-05		166.8	7.99198	11.6419	0.973017
MV6_66	0.282993	0.282994	2.48414e-05	1.46717	3.62458e-05	0.00127434	3.29906e-05		168.8	7.39951	11.0119	1.07928
MV6_67	0.282996	0.282997	1.93702e-05	1.46716	4.20833e-05	0.000606772	4.85247e-05		171.1	7.50025	11.2375	0.928867
MV6_68	0.283027	0.283029	2.24146e-05	1.46718	4.20007e-05	0.000732807	9.26503e-05		169.2	8.61426	12.2963	1.01069
MV6_69	0.282983	0.282985	1.97297e-05	1.46715	3.29039e-05	0.000679905	2.79083e-05		166.3	7.07126	10.6953	0.93829
MV6_70	0.282968	0.28297	1.96092e-05	1.46716	3.8003e-05	0.000677951	2.53291e-05		162.7	6.53206	10.0775	0.935158
MV6_71	0.283007	0.283009	2.47314e-05	1.4672	3.15536e-05	0.000724775	6.96541e-06		175	7.91721	11.7263	1.07608
MV6_72	0.282985	0.282986	3.72688e-05	1.46718	5.32662e-05	0.00140423	0.000190469		163.1	7.11339	10.5894	1.45902
MV6_74	0.283026	0.283028	2.46442e-05	1.46715	3.76393e-05	0.000855876	1.10404e-05		161	8.59358	12.0837	1.07353
MV6_75	0.283005	0.283006	1.99892e-05	1.46719	3.4103e-05	0.000793603	3.04389e-05		164.9	7.82223	11.4035	0.945084
MV6_76	0.282998	0.283	2.47902e-05	1.46717	3.96325e-05	0.000664001	3.31587e-05		167.4	7.58349	11.2335	1.07779
MV6_78	0.282987	0.282989	2.41451e-05	1.46718	3.80654e-05	0.000632518	2.57139e-05		176.7	7.21529	11.072	1.05937
MV6_79	0.283024	0.283026	2.37776e-05	1.46716	3.25597e-05	0.00108672	7.81659e-06		171.3	8.50989	12.1975	1.04886
MV6_80	0.282987	0.282989	2.24856e-05	1.46719	3.30064e-05	0.000786912	4.20383e-05		171	7.20569	10.9203	1.01274
MV6_83	0.282979	0.282981	2.26714e-05	1.46715	3.85744e-05	0.000785352	2.71632e-05		154.6	6.92048	10.2782	1.01792
MV6_84	0.282978	0.28298	2.37596e-05	1.46716	3.63086e-05	0.00103944	4.78403e-05		172.7	6.88478	10.6074	1.04846
MV6_86	0.283012	0.283014	1.73388e-05	1.46719	2.68409e-05	0.000821115	2.48079e-05		168.5	8.08735	11.744	0.877289
MV6_88	0.282471	0.282472	1.77546e-05	1.46718	3.55711e-05	0.00029535	2.62466e-06		174.2	-11.0602	-7.22642	0.888462
MV6_9	0.282984	0.282986	1.89366e-05	1.4672	3.22831e-05	0.000637713	1.23834e-05		162.2	7.09436	10.6334	0.917655
MV6_90	0.281711	0.281713	2.57808e-05	1.46719	3.79538e-05	0.000167097	7.7082e-06		164.3	-37.9149	-34.2953	0.915144
MV6_93	0.283011	0.283013	2.25876e-05	1.4672	3.83427e-05	0.00179767	0.00017157		172.3	8.04337	11.6714	1.01552

## Sheet: (S4) Standards 19-03-2020
Sample/spot	176Hf/177Hf	176Hf/177Hf (normalised)	2σ	178Hf/177Hf	2s	176Lu/177Hf	2s		Age (Ma)	e Hf (t = now)	e Hf (t)	2σ
MTZ-01	0.282502	-	1.59764e-05	1.46721	2.72177e-05	2.38455e-05	9.2575e-08		731	-10.0043	6.3216	0.565532
MTZ-02	0.282505	-	1.54016e-05	1.46718	2.975e-05	2.41956e-05	8.28547e-08		731	-9.90339	6.42253	0.545178
MTZ-03	0.282507	-	1.31596e-05	1.46718	2.62086e-05	2.4039e-05	8.66538e-08		731	-9.83741	6.4887	0.465816
MTZ-04	0.282516	-	1.35732e-05	1.46718	2.77608e-05	2.39742e-05	8.59852e-08		731	-9.50716	6.81952	0.48044
MTZ-05	0.282513	-	1.14724e-05	1.46721	2.38459e-05	2.32203e-05	9.92553e-08		731	-9.61292	6.71396	0.406083
MTZ-06	0.282515	-	1.60022e-05	1.46715	3.09707e-05	2.34941e-05	9.87492e-08		731	-9.54209	6.78477	0.566421
MTZ-07	0.282495	-	1.39038e-05	1.46717	3.05488e-05	2.36548e-05	7.98171e-08		731	-10.254	6.07163	0.492178
MTZ-08	0.28251	-	1.24261e-05	1.4672	2.24626e-05	2.37635e-05	9.05417e-08		731	-9.73871	6.58769	0.439848
MTZ-09	0.28252	-	1.83904e-05	1.46718	3.13502e-05	2.36211e-05	1.1994e-07		731	-9.36353	6.96355	0.650942
MTZ-10	0.282506	-	1.70304e-05	1.4672	3.11313e-05	2.42056e-05	1.49283e-07		731	-9.86878	6.4572	0.602833
MTZ-11	0.282505	-	1.80734e-05	1.46717	3.3529e-05	2.35234e-05	1.32655e-07		731	-9.89182	6.43445	0.639755
MTZ-12	0.282513	-	1.92899e-05	1.46717	3.36696e-05	2.40906e-05	1.0799e-07		731	-9.61008	6.71637	0.682798
MTZ-13	0.282494	-	1.39118e-05	1.46718	2.82198e-05	2.28704e-05	1.02671e-07		731	-10.2836	6.04234	0.492462
MTZ-14	0.282517	-	1.44739e-05	1.46721	2.73426e-05	2.30795e-05	8.00622e-08		731	-9.46987	6.8573	0.51232
MTZ-15	0.282511	-	1.52766e-05	1.46721	2.81149e-05	2.29255e-05	1.01751e-07		731	-9.67847	6.64844	0.540744
MTZ-16	0.282498	-	1.16659e-05	1.46719	3.07254e-05	2.34616e-05	1.0069e-07		731	-10.1471	6.17881	0.412955
MTZ-17	0.282501	-	1.28856e-05	1.46718	2.9149e-05	2.3445e-05	9.40883e-08		731	-10.0256	6.30049	0.456126
MTZ-18	0.282511	-	1.33076e-05	1.46717	2.7638e-05	2.27013e-05	8.38283e-08		731	-9.67412	6.6529	0.471046
MTZ-19	0.282515	-	1.29498e-05	1.4672	2.68573e-05	2.32313e-05	1.11058e-07		731	-9.5605	6.76645	0.458375
MTZ-20	0.282511	-	1.62034e-05	1.46716	3.67811e-05	2.30252e-05	1.52318e-07		731	-9.70304	6.62378	0.573552
MTZ-21	0.28248	-	2.13396e-05	1.46715	3.46969e-05	2.34104e-05	1.55412e-07		731	-10.7892	5.53565	0.755438
MTZ-22	0.282489	-	1.93332e-05	1.46722	4.08006e-05	2.36499e-05	1.66093e-07		731	-10.4567	5.86859	0.684386
MTZ-23	0.282496	-	1.72406e-05	1.46714	4.09287e-05	2.23553e-05	1.56875e-07		731	-10.2167	6.10963	0.610295
MTZ-24	0.282499	-	1.59439e-05	1.46718	2.43012e-05	2.31841e-05	1.05935e-07		731	-10.1139	6.21218	0.564389
MTZ-25	0.282508	-	1.44063e-05	1.46719	3.38468e-05	2.30453e-05	9.35957e-08		731	-9.79639	6.53027	0.509944
MTZ-26	0.282505	-	1.3977e-05	1.46716	2.89096e-05	2.28604e-05	8.39892e-08		731	-9.90981	6.41676	0.494753
MTZ-27	0.282509	-	1.31084e-05	1.46718	2.91566e-05	2.2422e-05	9.97293e-08		731	-9.75961	6.56741	0.464001
MTZ-28	0.282503	-	1.37567e-05	1.46718	2.59983e-05	2.167e-05	8.74726e-08		731	-9.97576	6.35128	0.486958
MTZ-29	0.282502	-	1.75894e-05	1.4672	2.81391e-05	2.21868e-05	7.37822e-08		731	-9.99456	6.33219	0.622627
FC1-3	0.282199	0.282201	2.37318e-05	1.46715	2.5761e-05	0.00123079	5.02808e-05		1099	-20.6502	3.08647	0.840955
FC1-6	0.282165	0.282167	3.18421e-05	1.46718	3.76575e-05	0.00063229	3.19463e-05		1099	-21.8711	2.30238	1.12849
FC1-11	0.282167	0.282168	2.35617e-05	1.46718	2.7711e-05	0.000702608	1.08413e-05		1099	-21.8053	2.31664	0.835021
FC1-12	0.282184	0.282185	2.87644e-05	1.46717	3.08396e-05	0.00135357	1.34943e-05		1099	-21.2054	2.43965	1.01934
FC1-13	0.282159	0.282161	2.24783e-05	1.46718	2.64613e-05	0.000774174	1.16252e-05		1099	-22.0723	1.99643	0.79665
FC1-14	0.282153	0.282154	2.168e-05	1.46721	2.49194e-05	0.000795159	8.45744e-06		1099	-22.3059	1.74679	0.768375
91500_1	0.282291	0.282293	2.46802e-05	1.46719	3.83076e-05	0.000304734	3.63117e-07		1065	-17.3994	6.2608	0.874277
91500_2	0.282298	0.2823	2.68008e-05	1.46715	3.65326e-05	0.000303887	3.71635e-07		1065	-17.1644	6.49696	0.949373
91500_3	0.282277	0.282279	3.48718e-05	1.46713	4.0366e-05	0.000308881	3.41878e-07		1065	-17.905	5.75105	1.23537
91500_4	0.282276	0.282277	2.8052e-05	1.4672	3.72942e-05	0.000294706	2.05823e-07		1065	-17.9467	5.71938	0.993774
91500_5	0.282273	0.282274	2.50439e-05	1.46717	3.77658e-05	0.000294902	3.40968e-07		1065	-18.0593	5.60638	0.887218
PLS_1	0.28246	0.282462	2.60809e-05	1.46717	3.06959e-05	9.0803e-05	1.59673e-06		337	-11.4212	-3.94511	0.92334
PLS_3	0.282457	0.282459	2.10841e-05	1.46716	2.42451e-05	9.25693e-05	1.84152e-06		337	-11.54	-4.06439	0.746449
PLS_4	0.2825	0.282502	2.29947e-05	1.46717	2.81701e-05	0.00010354	6.42661e-07		337	-10.0132	-2.53883	0.813965
PLS_5	0.282477	0.282479	2.30016e-05	1.46721	2.79448e-05	9.1322e-05	1.63849e-06		337	-10.8321	-3.35568	0.814277
PLS_6	0.282479	0.28248	2.37614e-05	1.46718	2.79658e-05	9.20097e-05	1.76493e-06		337	-10.7802	-3.30385	0.841171
PLS_7	0.28249	0.282492	2.2335e-05	1.46719	2.23131e-05	9.27454e-05	1.89546e-06		337	-10.3773	-2.9008	0.790642
PLS_8	0.282481	0.282483	2.11646e-05	1.46718	2.35907e-05	9.01847e-05	1.56298e-06		337	-10.6941	-3.21729	0.749235
PLS_9	0.282477	0.282479	2.17264e-05	1.46721	2.27185e-05	8.90776e-05	1.39446e-06		337	-10.8278	-3.35084	0.769132
PLS_10	0.282483	0.282484	2.15308e-05	1.46719	2.40402e-05	8.94541e-05	1.4271e-06		337	-10.6321	-3.15508	0.762195
PLS_11	0.282478	0.282479	2.11768e-05	1.4672	2.62025e-05	8.69613e-05	1.25707e-06		337	-10.8164	-3.33899	0.749675
PLS_12	0.282487	0.282488	2.2022e-05	1.46718	2.44602e-05	8.67798e-05	1.17938e-06		337	-10.4944	-3.01669	0.779571
PLS_13	0.282477	0.282479	2.37383e-05	1.46719	2.86078e-05	8.28987e-05	8.08078e-07		337	-10.8204	-3.34208	0.840356
PLS_14	0.28247	0.282471	2.38251e-05	1.46719	2.67246e-05	8.24566e-05	8.69333e-07		337	-11.0908	-3.61254	0.843452
PLS_15	0.282475	0.282476	2.12869e-05	1.46718	2.31975e-05	8.92582e-05	1.5698e-06		337	-10.9137	-3.4368	0.753583
PLS_16	0.282467	0.282468	2.1859e-05	1.46718	2.63646e-05	9.05502e-05	1.68832e-06		337	-11.1969	-3.72052	0.773857
PLS_17	0.282477	0.282478	2.10695e-05	1.46718	2.51767e-05	8.78062e-05	1.89741e-06		337	-10.8508	-3.37355	0.745881
PLS_18	0.282465	0.282466	2.13431e-05	1.46718	2.50425e-05	8.69384e-05	1.7235e-06		337	-11.2717	-3.79458	0.755599

## Sheet: (S5) Run 05-04-2020
Sample/spot	176Hf/177Hf	176Hf/177Hf (normalised)	2σ	178Hf/177Hf	2s	176Lu/177Hf	2s		Age (Ma)	e Hf (t = now)	e Hf (t)	2σ
2550367_68	-	0.283007	1.56402e-05	1.4672	2.63487e-05	0.00063355	3.34037e-05		169.1	7.84042	11.53	0.552644
2550367_69	-	0.282627	2.30056e-05	1.46721	2.61555e-05	0.0020313	1.6022e-05		228.4	-5.58208	-0.811597	0.813992
2550367_71	-	0.282905	2.11122e-05	1.46723	2.77939e-05	0.00262942	0.000118385		246.2	4.24884	9.29971	0.746265
2550367_77	-	0.282899	1.85974e-05	1.46724	2.91281e-05	0.00103133	5.67544e-05		163.6	4.03672	7.56318	0.657385
2550367_97	-	0.283023	2.16416e-05	1.46725	3.98133e-05	0.00124013	7.90463e-05		178	8.42717	12.2414	0.764658
2550367_131	-	0.282717	2.14596e-05	1.46725	3.14131e-05	0.000865909	7.95802e-05		156.1	-2.40187	0.975958	0.759047
2550364_R_43	-	0.283034	1.61022e-05	1.46725	2.87238e-05	0.000887519	2.80999e-05		159.4	8.80074	12.2518	0.568914
2550364_5	-	0.282749	1.69656e-05	1.46724	2.68966e-05	0.000777055	7.92276e-06		163.3	-1.25712	2.28835	0.600024
2550364_10	-	0.283025	2.02658e-05	1.46721	2.77393e-05	0.000674797	1.0188e-05		164.3	8.50446	12.0862	0.716041
2550364_12	-	0.283037	1.53278e-05	1.46722	3.17414e-05	0.000593405	2.15895e-05		162.2	8.92321	12.4675	0.541548
2550364_14	-	0.282753	1.72826e-05	1.46724	3.06246e-05	0.00079942	3.78846e-05		174.1	-1.11834	2.65823	0.611226
2550364_25	-	0.282593	1.81215e-05	1.46723	2.86075e-05	0.00135801	1.86178e-05		212.5	-6.78183	-2.25143	0.641259
2550364_36	-	0.282916	2.08975e-05	1.46726	3.28424e-05	0.00129323	2.02966e-05		165.9	4.62909	8.17541	0.738648
2550364_37	-	0.282751	1.91029e-05	1.4672	4.23506e-05	0.00143552	5.66485e-05		154.9	-1.18714	2.10759	0.675607
2550364_39	-	0.28302	1.95871e-05	1.46725	3.38185e-05	0.000673464	3.2165e-05		162.1	8.31925	11.8529	0.692074

[truncated: 3 more sheets: (S5) Standards 05-04-2020, Tucker et al 2016 Samples, Tucker et al 2016 Standards]
